# Supplementary material for: An atom-economical addition of methyl azaarenes with aromatic aldehydes via benzylic C(sp3)–H bond functionalization under solvent- and catalyst-free conditions
Source: publisher site journal article supplement (doi:10.3762/bjoc.16.259), 2020-12-23
Supplement: Additional file 1 [file 1860-5397-16-259-S1.pdf]

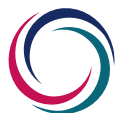

## Supporting Information

for

### **An atom-economical addition of methyl azaarenes with aromatic aldehydes via benzylic C(sp<sup>3</sup>)–H bond functionalization under solvent- and catalyst-free conditions**

Divya Rohini Yennamaneni, Vasu Amrutham, Krishna Sai Gajula, Rammurthy Banothu, Murali Boosa and Narender Nama

*Beilstein J. Org. Chem.* **2020**, *16*, 3093–3103. doi:10.3762/bjoc.16.259

### **Experimental procedures, compound characterization data, and NMR spectra**

## Table of Contents

|                                                                                |     |
|--------------------------------------------------------------------------------|-----|
| 1. Experimental section.....                                                   | S1  |
| i) Chemicals                                                                   |     |
| ii) General information                                                        |     |
| iii) General procedure                                                         |     |
| 2. Spectroscopic data of all products .....                                    | S3  |
| 3. Copies of $^1\text{H}$ and $^{13}\text{C}$ NMR spectra of all products..... | S11 |
| 4. References.....                                                             | S37 |

### 1. Experimental section

#### i) Chemicals

Ammonium  $\beta$  zeolite ( $\text{NH}_4\beta$ ) ( $\text{Si}/\text{Al} = 19$ ) was purchased from Alfa Aesar, England and calcined at  $500\text{ }^\circ\text{C}$  for 10 h to afford  $\text{H}\beta$ . MCM-41 ( $\text{Si}/\text{Al} = 30$ ) was synthesized [1], and H-mordenite ( $\text{Si}/\text{Al} = 12.5$ ) was purchased from Zeolyst C. V. Azaarenes and benzaldehyde derivatives were purchased from Sigma-Aldrich. All remaining chemicals used in this study were used as received.

#### ii) General information

$^1\text{H}$ NMR spectra were recorded at 300, 400, or 500 MHz and  $^{13}\text{C}$ NMR spectra at 75, 100, or 125 MHz in  $\text{CDCl}_3$ . The chemical shifts ( $\delta$ ) are described in ppm relative to TMS as an internal standard for  $^1\text{H}$ NMR and  $\text{CDCl}_3$  for  $^{13}\text{C}$ NMR spectra. Coupling constants ( $J$ ) are reported in Hz, and multiplicities are indicated as follows: s (singlet), br s (broad singlet), d (doublet), dd (doublet of doublet), t (triplet), m (multiplet). The mass spectrometric analysis was performed using a high-resolution Q-TOF mass spectrometer. The GC analysis was carried out using a GC Shimadzu (GC-2014) gas chromatograph equipped with an FID detector and a capillary column (EB-5, length 30 m, inner diameter 0.25 mm, film 0.25 mm). TLC inspections were

carried out on silica gel 60 F<sub>254</sub> plates. Column chromatography was performed on silica gel (100–200 mesh) using *n*-hexane/EtOAc as an eluent.

### **iii) General procedure**

Reactions were performed in a magnetically stirred 15 mL sealed vial and placed in a temperature-controlled oil bath. The appropriate benzaldehyde (1 mmol) was added to a pyridine or quinoline compounds (2 mmol), and the reaction mixture was allowed to stir at 135 °C for 24 hours. After the disappearance of the starting materials (as monitored by TLC analysis) or after the appropriate time, the reaction mixture was cooled to room temperature. The crude residue was further purified by column chromatography using silica gel (100–200 mesh) to afford pure products. All the products were identified on the basis of NMR and mass spectral data.

## 2. Spectroscopic data of all products

### 2-(6-Methylpyridin-2-yl)-1-(4-nitrophenyl)ethan-1-ol (3a)<sup>[2]</sup>

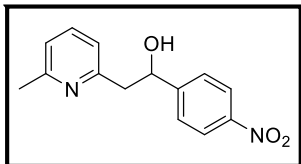

<sup>1</sup>H NMR (300 MHz, CDCl<sub>3</sub>)  $\delta$  (ppm) = 8.20 (d,  $J$  = 8.5 Hz, 2H), 7.60 (d,  $J$  = 8.5 Hz, 2H), 7.52 (t,  $J$  = 7.7 Hz, 1H), 7.07 (d,  $J$  = 7.7 Hz, 1H), 6.90 (d,  $J$  = 7.4 Hz, 1H), 5.25 (dd,  $J$  = 3.0, 8.5 Hz, 1H), 3.15-2.99 (m, 2H), 2.57 (s, 3H); <sup>13</sup>C NMR (100 MHz, CDCl<sub>3</sub>)  $\delta$  (ppm) = 158.12, 157.42, 151.62, 147.03, 137.41, 126.54, 123.50, 121.61, 120.59, 72.50, 44.46, 24.25.

### 2-(6-Methylpyridin-2-yl)-1-(3-nitrophenyl)ethan-1-ol (3b)<sup>[2]</sup>

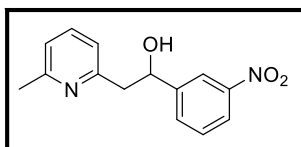

<sup>1</sup>H NMR (400 MHz, CDCl<sub>3</sub>)  $\delta$  (ppm) = 8.30 (s, 1H), 8.13-8.10 (m, 1H), 7.79 (d,  $J$  = 8.3 Hz, 1H), 7.53 (qt,  $J$  = 7.6 Hz, 2H), 7.07 (d,  $J$  = 7.7 Hz, 1H), 6.91 (d,  $J$  = 7.6 Hz, 1H), 5.24 (dd,  $J$  = 3.2, 8.6 Hz, 1H), 3.15-3.02 (m, 2H), 2.57 (s, 3H); <sup>13</sup>C NMR (125 MHz, CDCl<sub>3</sub>)  $\delta$  (ppm) = 158.22, 157.47, 148.24, 146.42, 137.40, 131.96, 129.18, 122.14, 121.60, 120.95, 120.59, 72.39, 44.56, 24.31.

### 2-(6-Methylpyridin-2-yl)-1-(2-nitrophenyl)ethan-1-ol (3c)<sup>[2]</sup>

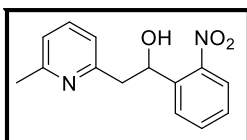

<sup>1</sup>H NMR (500 MHz, CDCl<sub>3</sub>)  $\delta$  (ppm) = 7.97 (dd,  $J$  = 7.9, 16.9 Hz, 2H), 7.64 (t,  $J$  = 7.6 Hz, 1H), 7.54 (t,  $J$  = 7.6 Hz, 1H), 7.41 (t,  $J$  = 7.6 Hz, 1H), 7.07 (d,  $J$  = 7.7 Hz, 1H), 6.98 (d,  $J$  = 7.6 Hz, 1H), 6.89 (brs, 1H), 5.63 (dd,  $J$  = 2.1, 9.0 Hz, 1H), 3.30 (dd,  $J$  = 2.1, 14.8 Hz, 1H), 3.02-2.97 (m, 1H), 2.57 (s, 3H); <sup>13</sup>C NMR (75 MHz, CDCl<sub>3</sub>)  $\delta$  (ppm) = 158.70, 157.31, 147.53, 139.67, 137.45, 133.43, 128.55, 127.83, 124.17, 121.52, 120.60, 69.16, 44.19, 24.32.

### (E)-2-Methyl-6-(2-nitrostyryl)pyridine (4c)

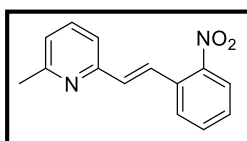

$^1\text{H}$  NMR (400 MHz,  $\text{CDCl}_3$ )  $\delta$  (ppm) = 7.99-7.95 (m, 2H), 7.81-7.79 (m, 1H), 7.62-7.56 (m, 2H), 7.45-7.40 (m, 1H), 7.32 (d,  $J$  = 7.7 Hz, 1H), 7.16 (d,  $J$  = 16.0 Hz, 1H), 7.06 (d,  $J$  = 7.5 Hz, 1H), 2.58 (s, 3H);  $^{13}\text{C}$  NMR (100 MHz,  $\text{CDCl}_3$ )  $\delta$  (ppm) = 158.49, 154.28, 148.24, 136.74, 133.65, 133.09, 132.54, 128.42, 127.27, 124.72, 122.50, 118.93, 24.57; HRMS (ESI):  $m/z$  calculated for  $\text{C}_{14}\text{H}_{13}\text{O}_2\text{N}_2[\text{M}+\text{H}]^+$ , 241.09715, found: 241.09674.

**1-(5-Fluoro-2-nitrophenyl)-2-(6-methylpyridin-2-yl)ethan-1-ol (3d)**

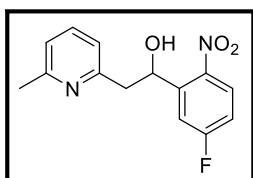

$^1\text{H}$  NMR (400 MHz,  $\text{CDCl}_3$ )  $\delta$  (ppm) = 8.08 (dd,  $J$  = 5.0, 9.0 Hz, 1H), 7.72 (dd,  $J$  = 2.8, 9.7 Hz, 1H), 7.55 (t,  $J$  = 7.7 Hz, 1H), 7.11-7.06 (m, 2H), 6.98 (d,  $J$  = 7.7 Hz, 1H), 5.68 (d,  $J$  = 9.7 Hz, 1H), 3.30 (dd,  $J$  = 2.2, 14.9 Hz, 1H), 2.94 (dd,  $J$  = 8.9, 14.9 Hz, 1H), 2.57 (s, 3H);  $^{13}\text{C}$  NMR (100 MHz,  $\text{CDCl}_3$ )  $\delta$  (ppm) = 166.74, 164.18, 158.37, 157.34, 144.15 (d,  $J$  = 8.7 Hz), 143.20, 137.56, 127.40 (d,  $J$  = 9.8 Hz), 121.67, 120.57, 115.7 (d,  $J$  = 25.0 Hz), 114.90 (d,  $J$  = 23.9 Hz), 69.13, 43.76, 24.29; HRMS (ESI):  $m/z$  calculated for  $\text{C}_{14}\text{H}_{14}\text{O}_3\text{N}_2\text{F}[\text{M}+\text{H}]^+$ , 277.0983, found: 277.0978.

**1-(3-Fluorophenyl)-2-(6-methylpyridin-2-yl)ethan-1-ol (3e)<sup>[2]</sup>**

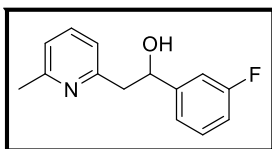

$^1\text{H}$  NMR (400 MHz,  $\text{CDCl}_3$ )  $\delta$  (ppm) = 7.51 (t,  $J$  = 7.7 Hz, 1H), 7.32-7.26 (m, 1H), 7.18-7.15 (m, 2H), 7.04 (d,  $J$  = 7.8 Hz, 1H), 6.96-6.89 (m, 2H), 5.13 (dd,  $J$  = 4.6, 7.4 Hz, 1H), 3.06-3.04 (m, 2H), 2.56 (s, 3H);  $^{13}\text{C}$  NMR (75 MHz,  $\text{CDCl}_3$ )  $\delta$  (ppm) = 162.95 (d,  $J$  = 245.7 Hz), 158.72, 157.37, 146.94 (d,  $J$  = 7.2 Hz), 137.23, 129.67 (d,  $J$  = 8.03 Hz), 121.37, 120.56, 114.04, 113.76, 112.93, 112.64, 72.71, 44.95, 24.32.

**(E)-2-(3-Fluorostyryl)-6-methylpyridine (4e)<sup>[2]</sup>**

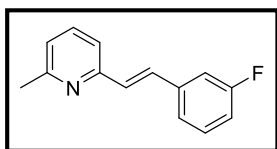

$^1\text{H}$  NMR (400 MHz,  $\text{CDCl}_3$ )  $\delta$  (ppm) = 7.58-7.53 (m, 2H), 7.35-7.28 (m, 3H), 7.22 (d,  $J$  = 7.5 Hz, 1H), 7.15 (d,  $J$  = 16.1 Hz, 1H), 7.04 (d,  $J$  = 7.7 Hz, 1H), 7.00-6.95 (m, 1H), 2.59 (s, 3H);  $^{13}\text{C}$  NMR (75 MHz,  $\text{CDCl}_3$ )  $\delta$  (ppm) = 163.09 (d,  $J$  = 244.9 Hz), 158.36, 154.51, 139.14 (d,  $J$

= 8.0 Hz), 136.69, 131.07, 130.05 (d,  $J = 8.8$  Hz), 129.59, 122.96, 122.01, 119.12, 114.90 (d,  $J = 21.6$  Hz), 113.25 (d,  $J = 21.6$  Hz), 24.61.

**1-(4-Fluorophenyl)-2-(6-methylpyridin-2-yl)ethan-1-ol (3f)<sup>[2]</sup>**

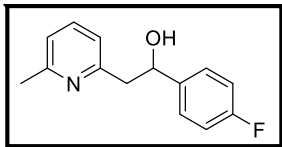

$^1\text{H}$  NMR (500 MHz,  $\text{CDCl}_3$ )  $\delta$  (ppm) = 7.50 (t,  $J = 7.6$  Hz, 1H), 7.40-7.37 (m, 2H), 7.05-7.00 (m, 3H), 6.89 (d,  $J = 7.6$  Hz, 1H), 5.11 (dd,  $J = 3.9, 8.0$  Hz, 1H), 3.08-3.00 (m, 2H), 2.55 (s, 3H);  $^{13}\text{C}$  NMR (75 MHz,  $\text{CDCl}_3$ )  $\delta$  (ppm) = 161.95 (d,  $J = 244.2$  Hz), 158.84, 157.36, 139.91 (d,  $J = 2.7$  Hz), 137.21, 127.37 (d,  $J = 8.2$  Hz), 121.33, 120.58, 115.13, 114.86, 72.73, 45.26, 24.29.

**1-(4-Chlorophenyl)-2-(6-methylpyridin-2-yl)ethan-1-ol (3g)<sup>[2]</sup>**

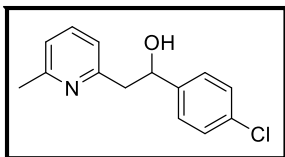

$^1\text{H}$  NMR (400 MHz,  $\text{CDCl}_3$ )  $\delta$  (ppm) = 7.51 (t,  $J = 7.7$  Hz, 1H), 7.37-7.29 (m, 4H), 7.04 (d,  $J = 7.7$  Hz, 1H), 6.89 (d,  $J = 7.5$  Hz, 1H), 5.11 (t,  $J = 6.1$  Hz, 1H), 3.03 (d,  $J = 5.8$  Hz, 2H), 2.55 (s, 3H);  $^{13}\text{C}$  NMR (125 MHz,  $\text{CDCl}_3$ )  $\delta$  (ppm) = 158.76, 157.38, 142.70, 137.24, 132.73, 128.36, 127.19, 121.37, 120.57, 72.69, 45.04, 24.33.

**1-(4-Bromophenyl)-2-(6-methylpyridin-2-yl)ethan-1-ol (3h)**

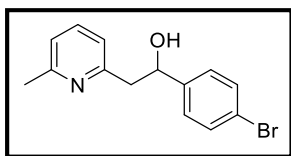

$^1\text{H}$  NMR (400 MHz,  $\text{CDCl}_3$ )  $\delta$  (ppm) = 7.51 (t,  $J = 7.6$  Hz, 1H), 7.47-7.44 (m, 2H), 7.32-7.29 (m, 2H), 7.05 (d,  $J = 7.6$  Hz, 1H), 6.89 (d,  $J = 7.6$  Hz, 1H), 5.09 (t,  $J = 5.9$  Hz, 1H), 3.06-2.98 (m, 2H), 2.55 (s, 3H);  $^{13}\text{C}$  NMR (125 MHz,  $\text{CDCl}_3$ )  $\delta$  (ppm) = 158.73, 157.38, 143.23, 137.24, 131.30, 127.56, 121.37, 120.57, 72.72, 44.98, 24.33; HRMS (ESI):  $m/z$  calculated for  $\text{C}_{14}\text{H}_{15}\text{ONBr}[\text{M}+\text{H}]^+$ , 292.03315, found: 292.03254.

**(E)-4-(2-(6-Methylpyridin-2-yl)vinyl)benzonitrile (4i)<sup>[2]</sup>**

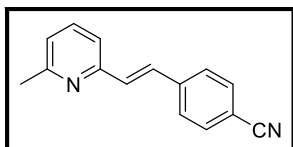

$^1\text{H}$  NMR (500 MHz,  $\text{CDCl}_3$ )  $\delta$  (ppm) = 7.64 (s, 4H), 7.62-7.57 (m, 2H), 7.26-7.22 (m, 2H), 7.07 (d,  $J$  = 7.6 Hz, 1H), 2.59 (s, 3H);  $^{13}\text{C}$  NMR (75 MHz,  $\text{CDCl}_3$ )  $\delta$  (ppm) = 158.55, 153.84, 141.25, 136.79, 132.39, 131.72, 130.19, 127.31, 122.56, 119.66, 118.86, 111.02, 24.58.

**(E)-2-Methyl-6-(2-(trifluoromethyl)styryl)pyridine (4j)**<sup>[2]</sup>

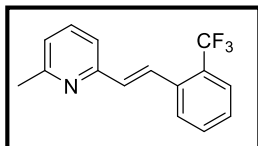

$^1\text{H}$  NMR (400 MHz,  $\text{CDCl}_3$ )  $\delta$  (ppm) = 7.89-7.82 (m, 2H), 7.68 (d,  $J$  = 7.9 Hz, 1H), 7.59-7.52 (m, 2H), 7.37 (t,  $J$  = 7.6 Hz, 1H), 7.33 (d,  $J$  = 7.6 Hz, 1H), 7.16 (d,  $J$  = 15.8 Hz, 1H), 7.05 (d,  $J$  = 7.6 Hz, 1H), 2.59 (s, 3H);  $^{13}\text{C}$  NMR (100 MHz,  $\text{CDCl}_3$ )  $\delta$  (ppm) = 158.40, 154.73, 136.67, 135.89, 132.78, 131.89, 128.04, 127.72, 127.65, 127.30, 125.99-125.72 (m), 122.99, 122.18, 118.52, 24.57.

**(E)-4-(2-(6-Methylpyridin-2-yl)vinyl)benzaldehyde (4k)**

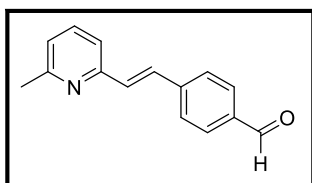

$^1\text{H}$  NMR (400 MHz,  $\text{CDCl}_3$ )  $\delta$  (ppm) = 10.00 (s, 1H), 7.89-7.87 (m, 2H), 7.72-7.70 (m, 2H), 7.67-7.63 (m, 1H), 7.58 (t,  $J$  = 7.7 Hz, 1H), 7.31-7.24 (m, 2H), 7.07 (d,  $J$  = 7.5 Hz, 1H), 2.60 (s, 3H);  $^{13}\text{C}$  NMR (100 MHz,  $\text{CDCl}_3$ )  $\delta$  (ppm) = 191.54, 158.53, 154.15, 142.83, 136.76, 135.64, 131.58, 130.85, 130.13, 127.41, 122.42, 119.55, 24.60; HRMS (ESI):  $m/z$  calculated for  $\text{C}_{15}\text{H}_{14}\text{ON}[\text{M}+\text{H}]^+$ , 224.10699, found: 224.10648.

**N-(4-(1-Hydroxy-2-(6-methylpyridin-2-yl)ethyl)phenyl)acetamide (3l)**

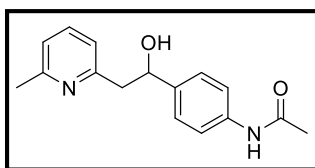

$^1\text{H}$  NMR (500 MHz,  $\text{CDCl}_3+\text{DMSO}-d_6$ )  $\delta$  (ppm) = 7.51 (t,  $J$  = 7.7 Hz, 1H), 7.46-7.35 (m, 4H), 7.04 (d,  $J$  = 7.7 Hz, 1H), 6.90 (d,  $J$  = 7.7 Hz, 1H), 5.09 (dd,  $J$  = 4.0, 8.1 Hz, 1H), 3.11-3.01 (m, 2H), 2.55 (s, 3H), 2.16 (s, 3H);  $^{13}\text{C}$  NMR (75 MHz,  $\text{CDCl}_3+\text{DMSO}-d_6$ )  $\delta$  (ppm) = 168.03, 157.97, 156.28, 138.90, 137.14, 136.12, 125.34, 120.25, 120.04, 118.66, 72.02, 45.26, 39.47, 23.50, 23.39; HRMS (ESI):  $m/z$  calculated for  $\text{C}_{16}\text{H}_{19}\text{O}_2\text{N}_2$   $[\text{M}+\text{H}]^+$ , 271.1441 found: 271.1434.

**(E)-4-(2-(6-Methylpyridin-2-yl)vinyl)phenol (4m)**

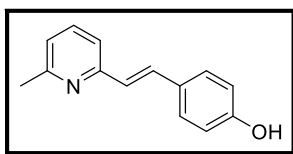

$^1\text{H}$  NMR (400 MHz,  $\text{CDCl}_3+\text{DMSO}-d_6$ )  $\delta$  (ppm) = 7.62 (t,  $J$  = 7.7 Hz, 1H), 7.54-7.46 (m, 3H), 7.27 (d,  $J$  = 7.7 Hz, 1H), 7.06-7.01 (m, 2H), 6.78 (d,  $J$  = 8.5 Hz, 2H), 2.47 (s, 3H);  $^{13}\text{C}$  NMR (75 MHz,  $\text{CDCl}_3+\text{DMSO}-d_6$ )  $\delta$  (ppm) = 157.19, 154.76, 136.03, 131.61, 127.71, 127.30, 124.54, 120.50, 117.62, 115.17, 23.85; HRMS (ESI):  $m/z$  calculated for  $\text{C}_{14}\text{H}_{14}\text{ON}[\text{M}+\text{H}]^+$ , 212.1070, found: 212.1066.

**(E)-2-(2-(6-Methylpyridin-2-yl)vinyl)phenol (4n)**

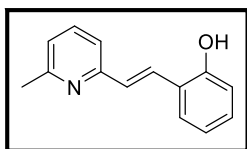

$^1\text{H}$  NMR (400 MHz,  $\text{CDCl}_3+\text{DMSO}-d_6$ )  $\delta$  (ppm) = 7.88 (d,  $J$  = 16.2 Hz, 1H), 7.65-7.53 (m, 2H), 7.28-7.24 (m, 1H), 7.14-6.76 (m, 5H), 2.49 (s, 3H);  $^{13}\text{C}$  NMR (75 MHz,  $\text{CDCl}_3+\text{DMSO}-d_6$ )  $\delta$  (ppm) = 157.48, 155.39, 154.78, 136.85, 129.11, 127.32, 126.85, 123.13, 121.29, 119.21, 115.80, 24.19; HRMS (ESI):  $m/z$  calculated for  $\text{C}_{14}\text{H}_{16}\text{O}_2\text{N}[\text{M}+\text{H}+\text{H}_2\text{O}]^+$ , 230.1176, found: 230.1170.

**(E)-2-Methyl-6-(4-methylstyryl)pyridine (4o)<sup>[2]</sup>**

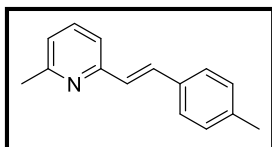

$^1\text{H}$  NMR (400 MHz,  $\text{CDCl}_3$ )  $\delta$  (ppm) = 7.56-7.51 (m, 2H), 7.48-7.46 (m, 2H), 7.22 (d,  $J$  = 7.7 Hz, 1H), 7.18-7.10 (m, 3H), 7.00 (d,  $J$  = 7.5 Hz, 1H), 2.58 (s, 3H), 2.36 (s, 3H);  $^{13}\text{C}$  NMR (100 MHz,  $\text{CDCl}_3$ )  $\delta$  (ppm) = 158.19, 155.31, 138.14, 136.58, 134.00, 132.30, 129.37, 127.46, 126.97, 121.46, 118.58, 24.64, 21.28.

**2-(6-Methylpyridin-2-yl)-1-phenylethan-1-ol (3p)<sup>[2]</sup>**

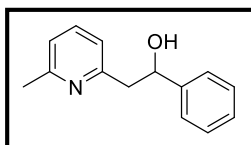

$^1\text{H}$  NMR (400 MHz,  $\text{CDCl}_3$ )  $\delta$  (ppm) = 7.52 (t,  $J$  = 7.5 Hz, 1H), 7.44-7.41 (m, 2H), 7.35-7.31 (m, 2H), 7.27-7.23 (m, 1H), 7.05 (d,  $J$  = 7.7 Hz, 1H), 6.91 (d,  $J$  = 7.5 Hz, 1H), 5.16-5.12 (m,



1H), 3.13-3.11 (m, 2H), 2.57 (s, 3H) ;  $^{13}\text{C}$  NMR (75 MHz,  $\text{CDCl}_3$ )  $\delta$  (ppm) = 158.72, 157.17, 144.02, 137.42, 132.90, 129.95, 128.23, 127.17, 125.77, 121.46, 120.86, 73.44, 45.28, 23.94.

**(E)-2-Methyl-6-(2-(pyridin-2-yl)vinyl)pyridine (4q)**

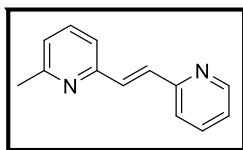

$^1\text{H}$  NMR (400 MHz,  $\text{CDCl}_3$ )  $\delta$  (ppm) = 8.62 (d,  $J$  = 4.7 Hz, 1H), 7.71-7.62 (m, 3H), 7.56 (t,  $J$  = 7.7 Hz, 1H), 7.46 (d,  $J$  = 7.8 Hz, 1H), 7.26 (d,  $J$  = 6.8 Hz, 1H), 7.17 (dd,  $J$  = 1.1, 4.8 Hz, 1H), 7.05 (d,  $J$  = 7.7 Hz, 1H), 2.59 (s, 3H);  $^{13}\text{C}$  NMR (100 MHz,  $\text{CDCl}_3$ )  $\delta$  (ppm) = 158.37, 155.19, 154.33, 149.64, 136.73, 136.53, 132.09, 131.45, 122.88, 122.44, 122.32, 120.16, 24.63; HRMS (ESI):  $m/z$  calculated for  $\text{C}_{13}\text{H}_{13}\text{N}_2[\text{M}+\text{H}]^+$ , 197.1073, found: 197.1071.

**2-(6-Methylpyridin-2-yl)-1-(thiophen-2-yl)ethan-1-ol (3r)**

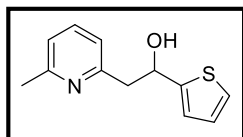

$^1\text{H}$  NMR (400 MHz,  $\text{CDCl}_3$ )  $\delta$  (ppm) = 7.51 (t,  $J$  = 7.7 Hz, 1H), 7.21 (dd,  $J$  = 1.3, 4.8 Hz, 1H), 7.04 (d,  $J$  = 7.7 Hz, 1H), 6.98-6.93 (m, 3H), 5.40 (dt,  $J$  = 0.7, 5.9 Hz, 1H), 3.20 (d,  $J$  = 5.7 Hz, 2H), 2.54 (s, 3H);  $^{13}\text{C}$  NMR (100 MHz,  $\text{CDCl}_3$ )  $\delta$  (ppm) = 158.59, 157.34, 148.36, 137.18, 126.43, 124.06, 122.88, 121.35, 120.68, 69.64, 44.98, 24.27; HRMS (ESI):  $m/z$  calculated for  $\text{C}_{12}\text{H}_{14}\text{ONS}[\text{M}+\text{H}]^+$ , 220.07906, found: 220.07861.

**2-(4,6-Dimethylpyridin-2-yl)-1-(4-nitrophenyl)ethan-1-ol (5b)<sup>[3]</sup>**

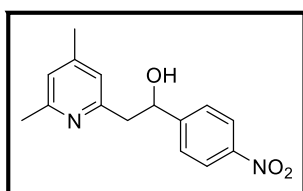

$^1\text{H}$  NMR (400 MHz,  $\text{CDCl}_3$ )  $\delta$  (ppm) = 8.19 (d,  $J$  = 8.6 Hz, 2H), 7.59 (d,  $J$  = 8.4 Hz, 2H), 6.89 (s, 1H), 6.72 (s, 1H), 5.22 (dd,  $J$  = 3.0, 8.8 Hz, 1H), 3.08-2.94 (m, 2H), 2.51 (s, 3H), 2.27 (s, 3H);  $^{13}\text{C}$  NMR (100 MHz,  $\text{CDCl}_3$ )  $\delta$  (ppm) = 157.91, 157.09, 151.80, 148.67, 147.03, 126.56, 123.53, 122.57, 121.56, 72.59, 44.31, 24.06, 20.90.

**1-(4-Nitrophenyl)-2-(pyridin-2-yl)propan-1-ol (5c)**

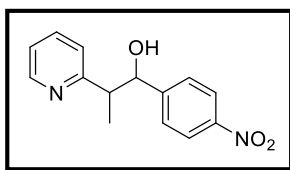

$^1\text{H}$  NMR (400 MHz,  $\text{CDCl}_3$ )  $\delta$  (ppm) = 8.52-8.50 (m, 1H), 8.09-8.06 (m, 2H), 7.53 (dt,  $J$  = 1.9, 7.7 Hz, 1H), 7.40-7.36 (m, 2H), 7.17-7.13 (m, 1H), 6.90 (d,  $J$  = 8.5 Hz, 1H), 5.04 (d,  $J$  = 4.5 Hz, 1H), 3.22-3.15 (m, 1H), 1.47 (d,  $J$  = 7.2 Hz, 3H);  $^{13}\text{C}$  NMR (100 MHz,  $\text{CDCl}_3$ )  $\delta$  (ppm) = 162.79, 151.94, 148.29, 146.84, 137.20, 126.74, 123.21, 122.00, 77.51, 46.64, 19.31; HRMS (ESI):  $m/z$  calculated for  $\text{C}_{14}\text{H}_{15}\text{O}_3\text{N}_2[\text{M}+\text{H}]^+$ , 259.10772, found: 259.10724.

**1-(4-Nitrophenyl)-2-(pyridin-2-yl)ethan-1-ol (5d)<sup>[3]</sup>**

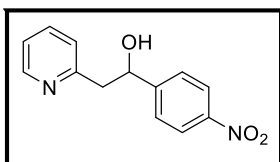

$^1\text{H}$  NMR (400 MHz,  $\text{CDCl}_3$ )  $\delta$  (ppm) = 8.55-8.53 (m, 1H), 8.21-8.17 (m, 2H), 7.65 (dt,  $J$  = 1.8, 7.7 Hz, 1H), 7.59 (d,  $J$  = 8.3 Hz, 2H), 7.25-7.22 (m, 1H), 7.10 (d,  $J$  = 7.8 Hz, 1H), 5.29 (dd,  $J$  = 3.3, 8.6 Hz, 1H), 3.22-3.08 (m, 2H);  $^{13}\text{C}$  NMR (100 MHz,  $\text{CDCl}_3$ )  $\delta$  (ppm) = 158.66, 151.39, 148.33, 137.32, 126.57, 123.91, 123.57, 122.14, 72.50, 44.77.

**(E)-2-(4-Nitrostyryl)pyridine (6d)**

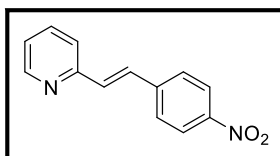

$^1\text{H}$  NMR (500 MHz,  $\text{CDCl}_3$ )  $\delta$  (ppm) = 8.64 (d,  $J$  = 5.6 Hz, 1H), 8.24 (d,  $J$  = 8.8 Hz, 2H); 7.73-7.69 (m, 4H), 7.42 (d,  $J$  = 7.7 Hz, 1H), 7.30 (d,  $J$  = 16.0 Hz, 1H), 7.24-7.21 (m, 1H);  $^{13}\text{C}$  NMR (100 MHz,  $\text{CDCl}_3$ )  $\delta$  (ppm) = 154.34, 149.92, 143.10, 136.78, 132.10, 130.22, 127.50, 124.13, 123.05; HRMS (ESI):  $m/z$  calculated for  $\text{C}_{13}\text{H}_{11}\text{O}_2\text{N}_2[\text{M}+\text{H}]^+$ , 227.08150, found: 227.08111.

**(E)-2-(4-Nitrostyryl)quinoline (6f)<sup>[3]</sup>**

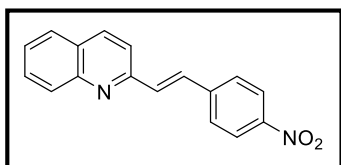

$^1\text{H}$  NMR (400 MHz,  $\text{CDCl}_3$ )  $\delta$  (ppm) = 8.26 (d,  $J$  = 8.8 Hz, 2H), 8.18 (d,  $J$  = 8.4 Hz, 1H), 8.10 (d,  $J$  = 8.4 Hz, 1H), 7.83-7.72 (m, 5H), 7.67 (d,  $J$  = 8.5 Hz, 1H), 7.56-7.50 (m, 2H);  $^{13}\text{C}$  NMR

(100 MHz, CDCl<sub>3</sub>)  $\delta$  (ppm) = 154.61, 148.24, 147.36, 142.92, 136.67, 133.11, 131.65, 130.04, 129.35, 127.62, 127.55, 126.76, 124.15, 119.70.

**(E)-6-Fluoro-2-(4-nitrostyryl)quinoline (6g)**

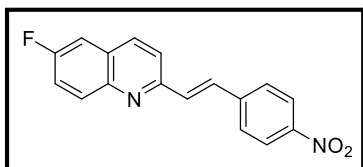

<sup>1</sup>H NMR (400 MHz, CDCl<sub>3</sub>)  $\delta$  (ppm) = 8.27 (d,  $J$  = 8.8 Hz, 2H), 8.14-8.08 (m, 2H), 7.78-7.74 (m, 3H), 7.68 (d,  $J$  = 8.5 Hz, 1H), 7.54-7.42 (m, 3H); <sup>13</sup>C NMR (100 MHz, CDCl<sub>3</sub>)  $\delta$  (ppm) = 154.04, 147.42, 145.37, 142.85, 136.03 (d,  $J$  = 5.5 Hz), 132.77, 131.87 (d,  $J$  = 8.8 Hz), 131.66, 128.21 (d,  $J$  = 9.9 Hz), 127.65, 124.19, 120.51, 120.12, 110.68 (d,  $J$  = 21.4 Hz) ; HRMS (ESI):  $m/z$  calculated for C<sub>17</sub>H<sub>12</sub>O<sub>2</sub>N<sub>2</sub>F[M+H]<sup>+</sup>, 295.0877, found: 295.0873.

### 3. Copies of $^1\text{H}$ and $^{13}\text{C}$ NMR spectra of all products

#### 2-(6-Methylpyridin-2-yl)-1-(4-nitrophenyl)ethan-1-ol (3a)

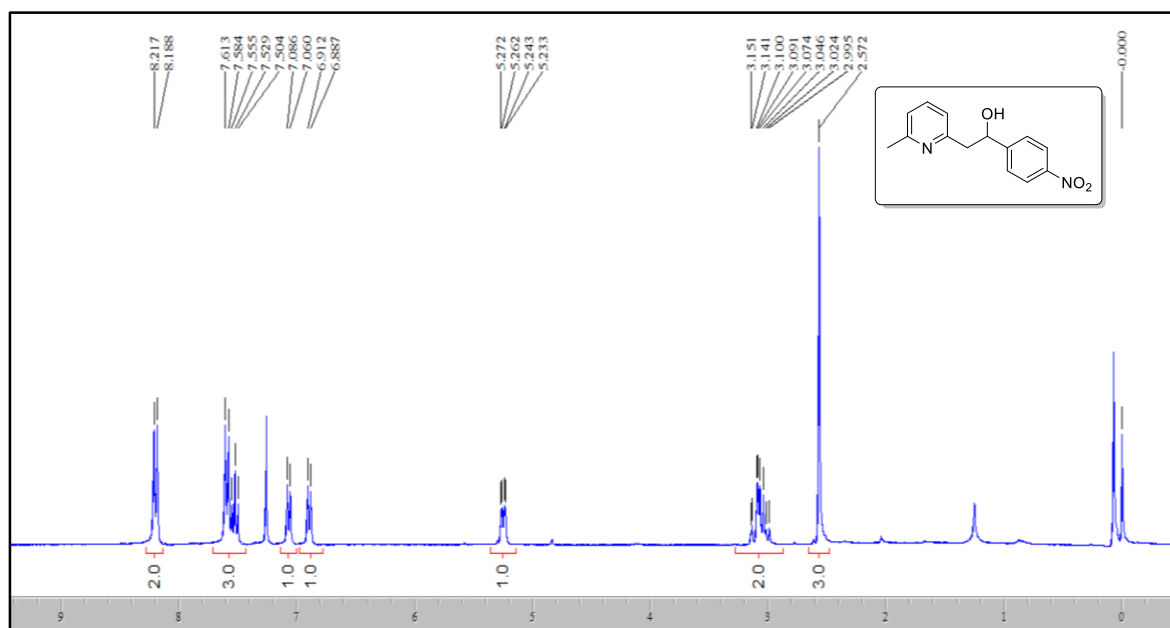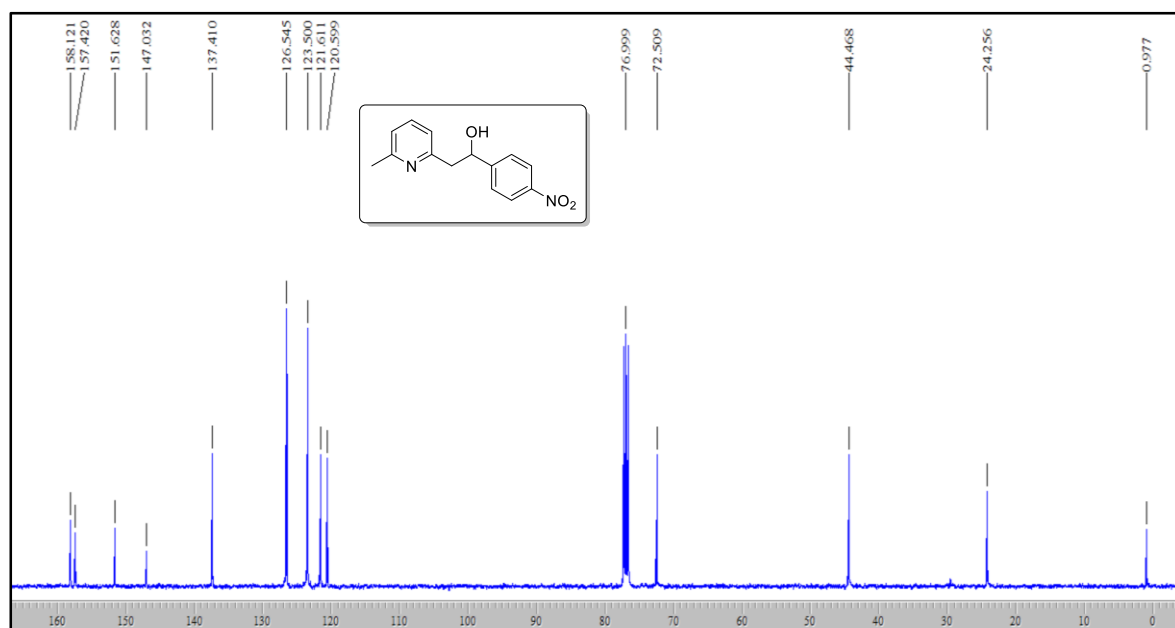

**2-(6-Methylpyridin-2-yl)-1-(3-nitrophenyl)ethan-1-ol (3b)**

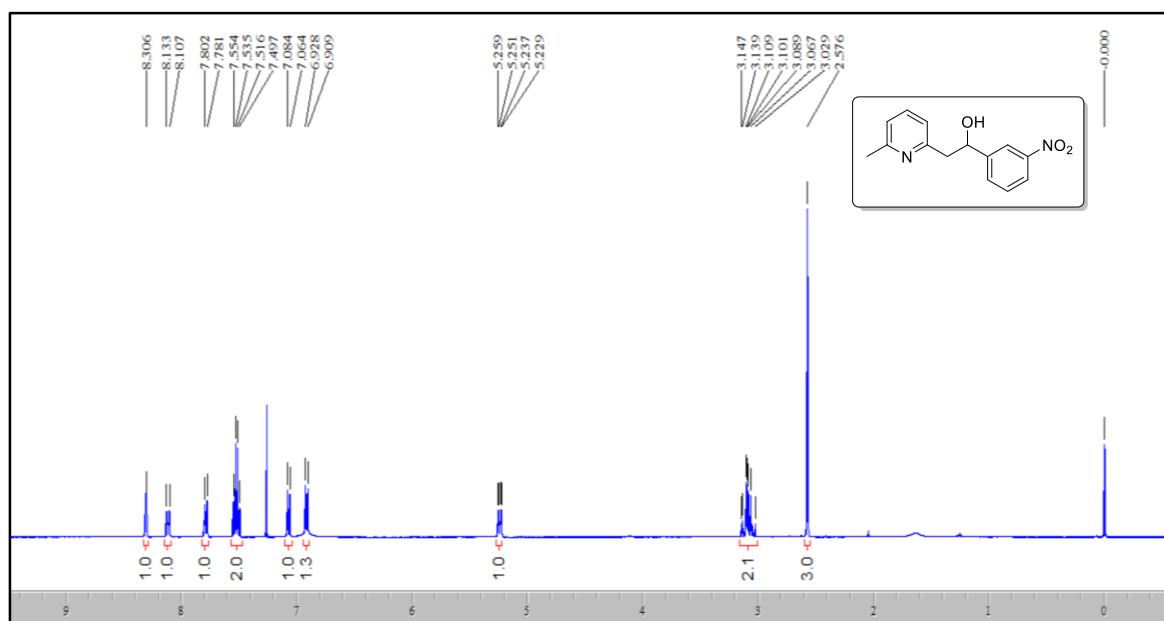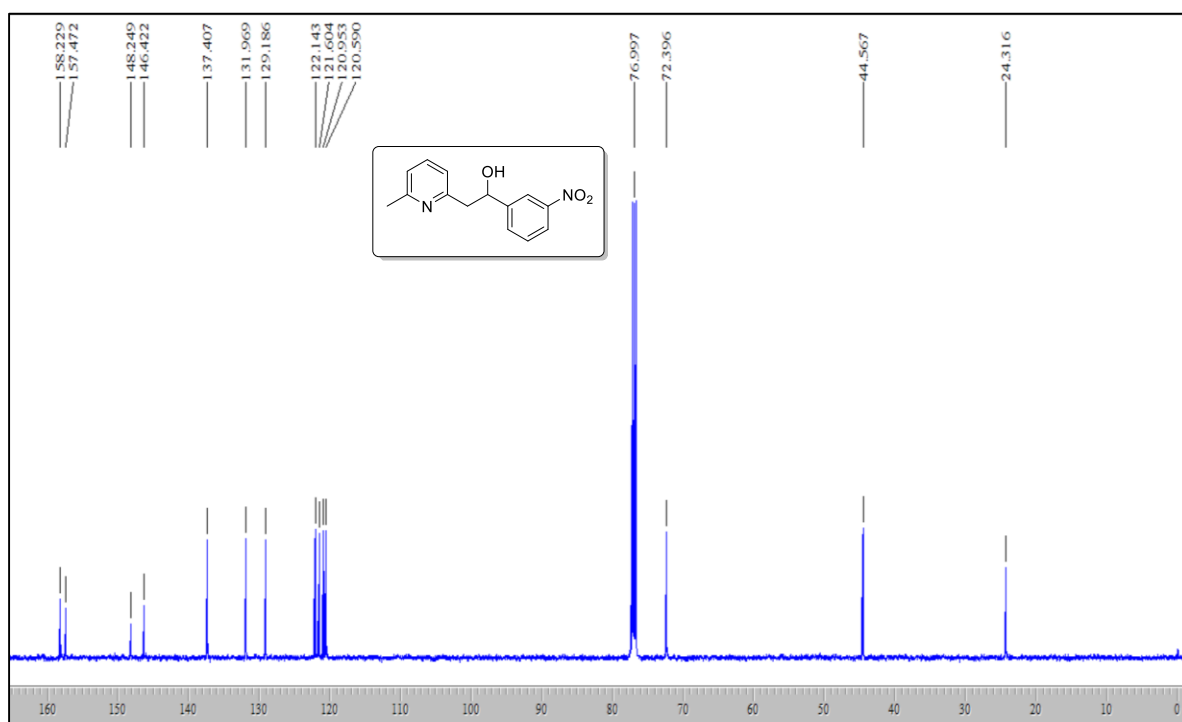

**2-(6-Methylpyridin-2-yl)-1-(2-nitrophenyl)ethan-1-ol (3c)**

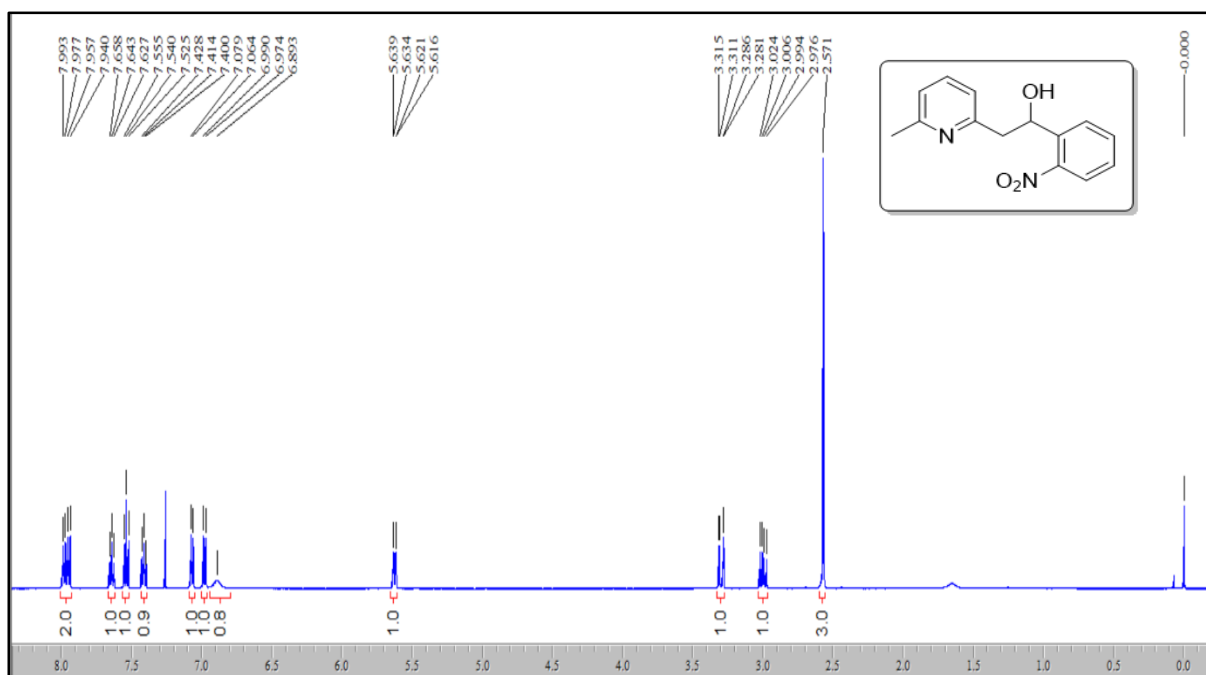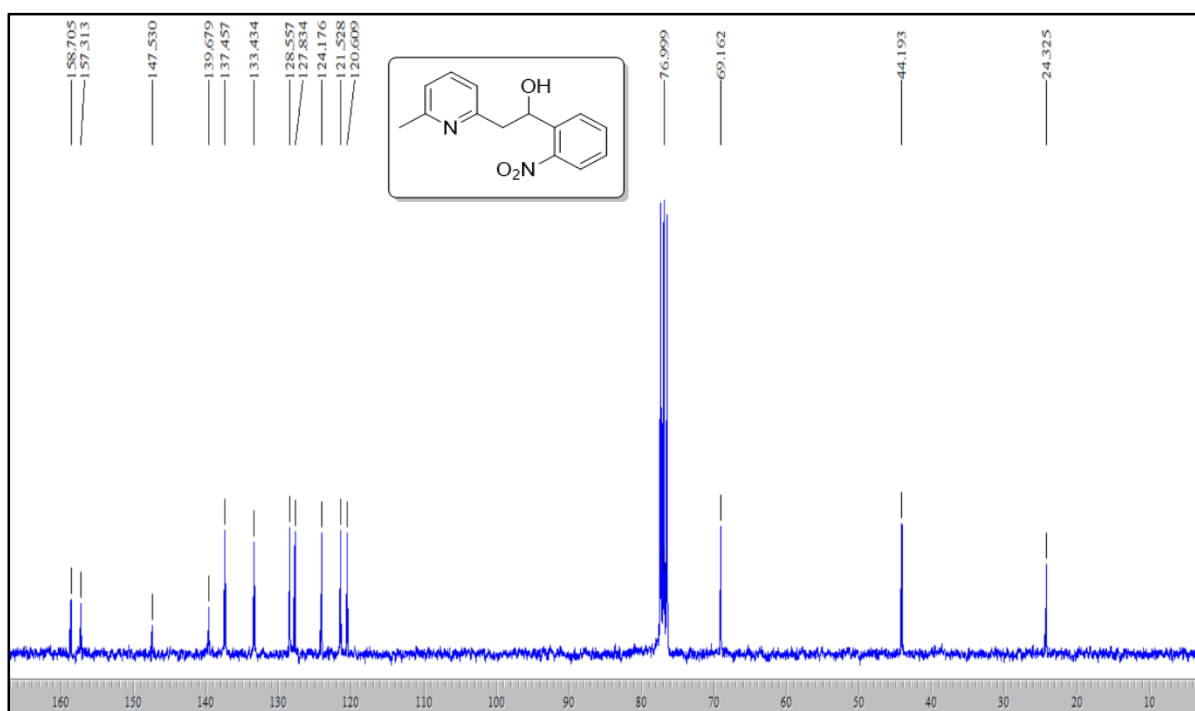

**(E)-2-Methyl-6-(2-nitrostyryl)pyridine (4c)**

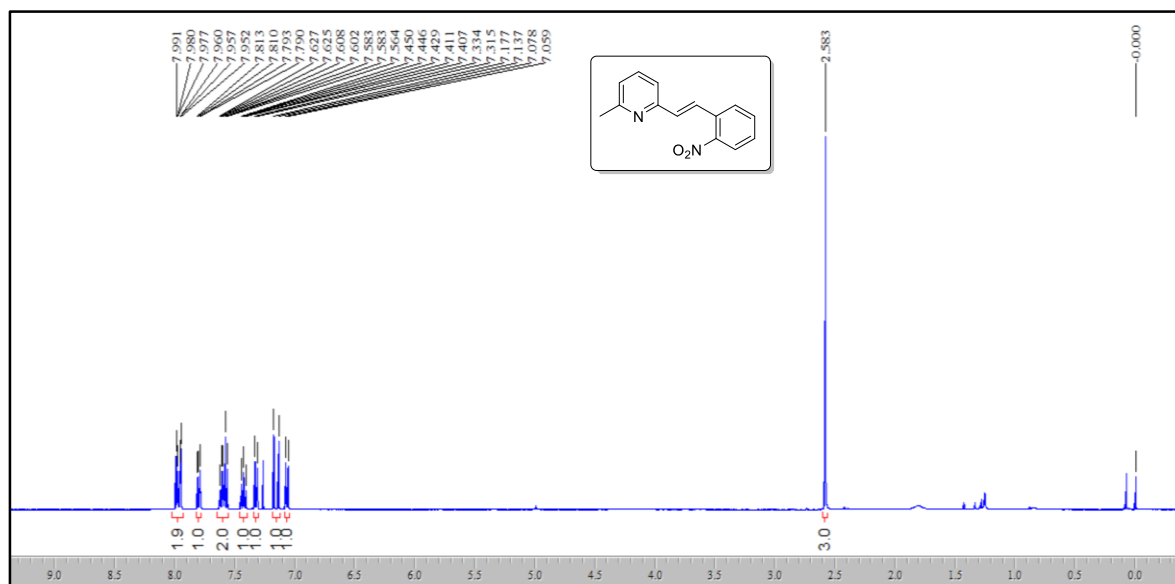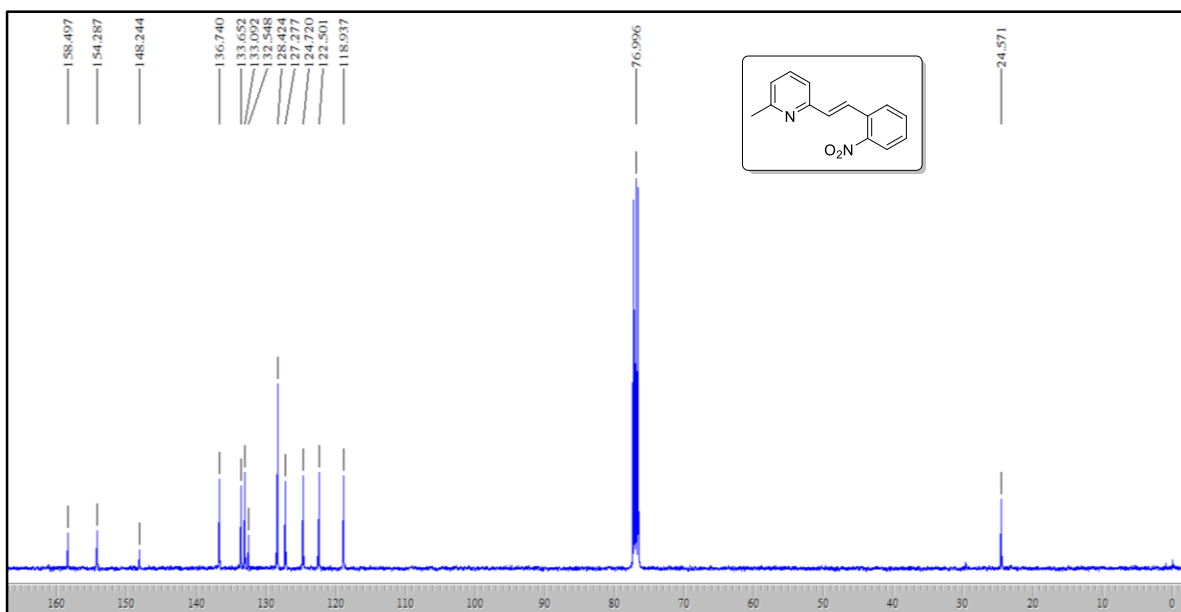

**1-(5-Fluoro-2-nitrophenyl)-2-(6-methylpyridin-2-yl)ethan-1-ol (3d)**

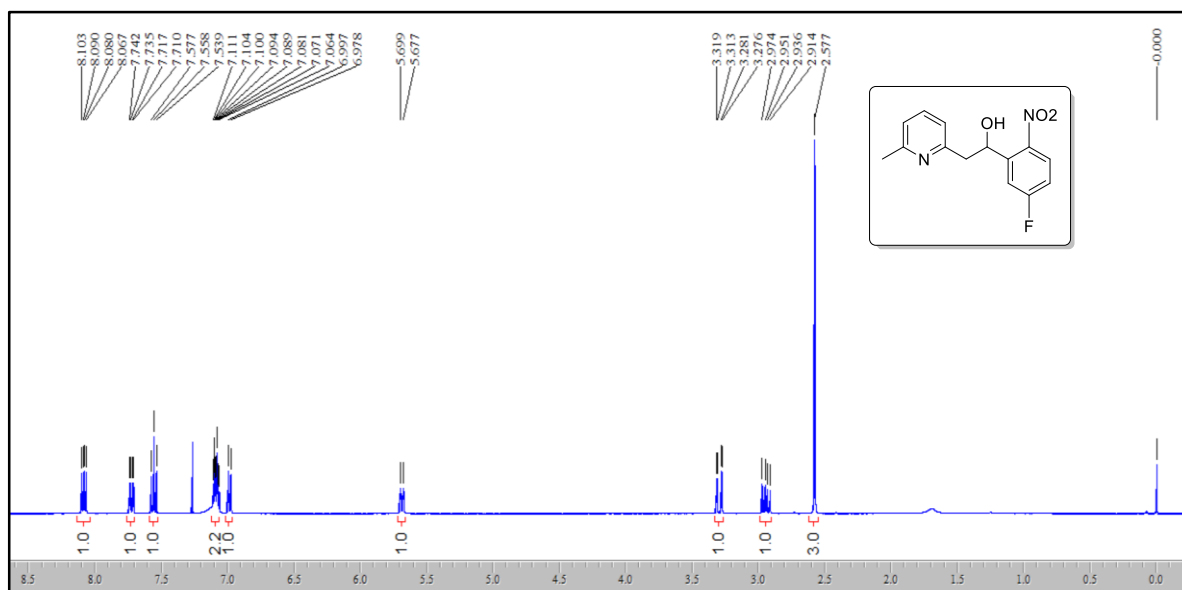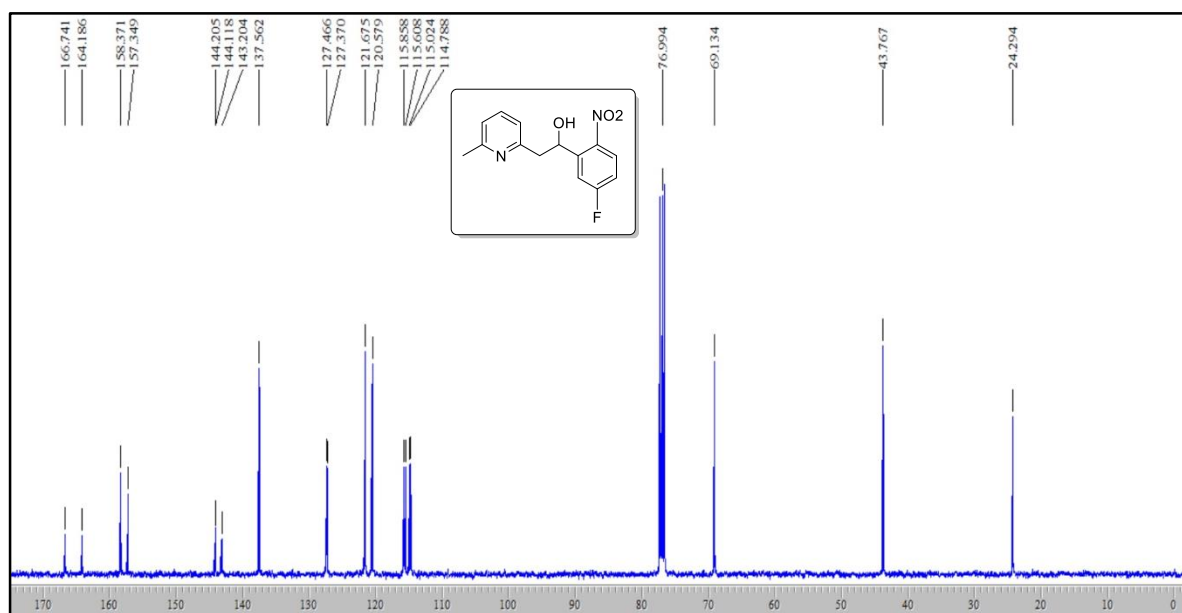



# **1-(3-Fluorophenyl)-2-(6-methylpyridin-2-yl)ethan-1-ol (3e)**

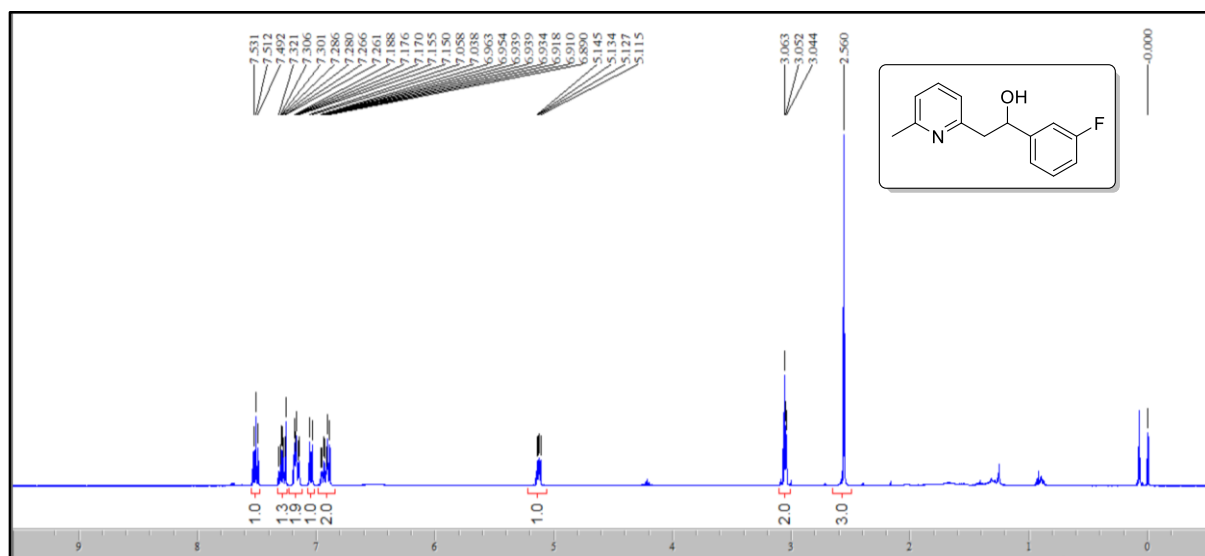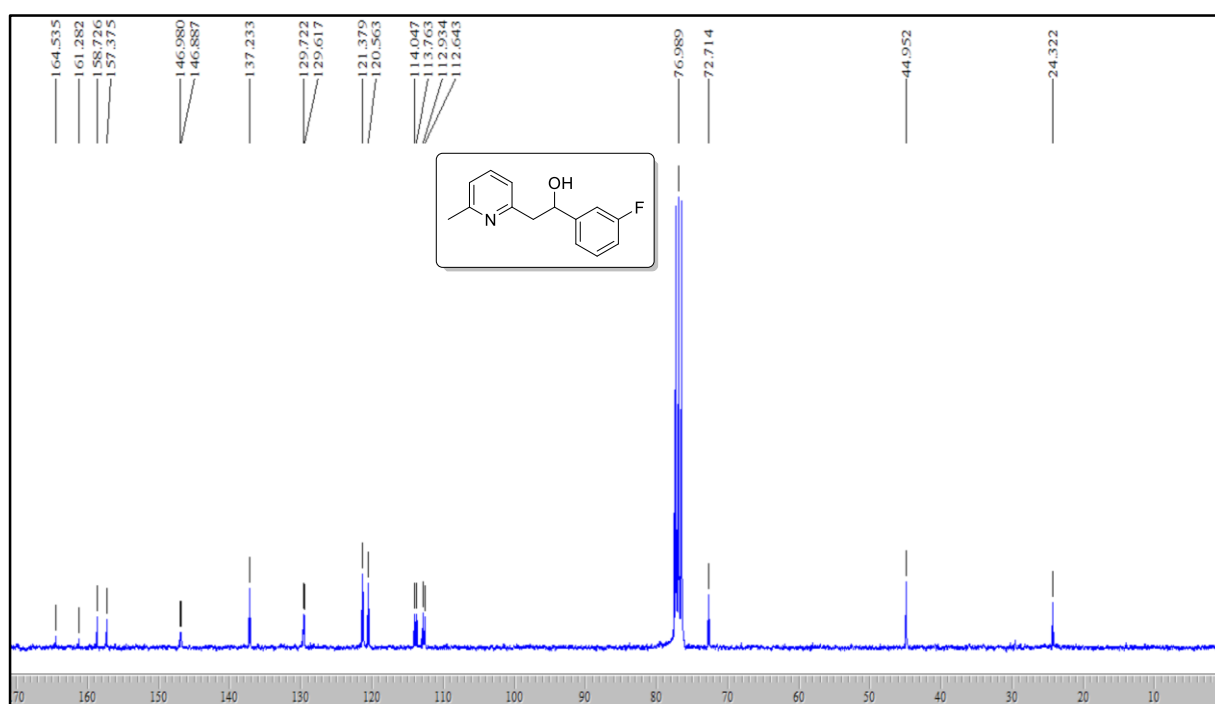

**(E)-2-(3-Fluorostyryl)-6-methylpyridine (4e)**

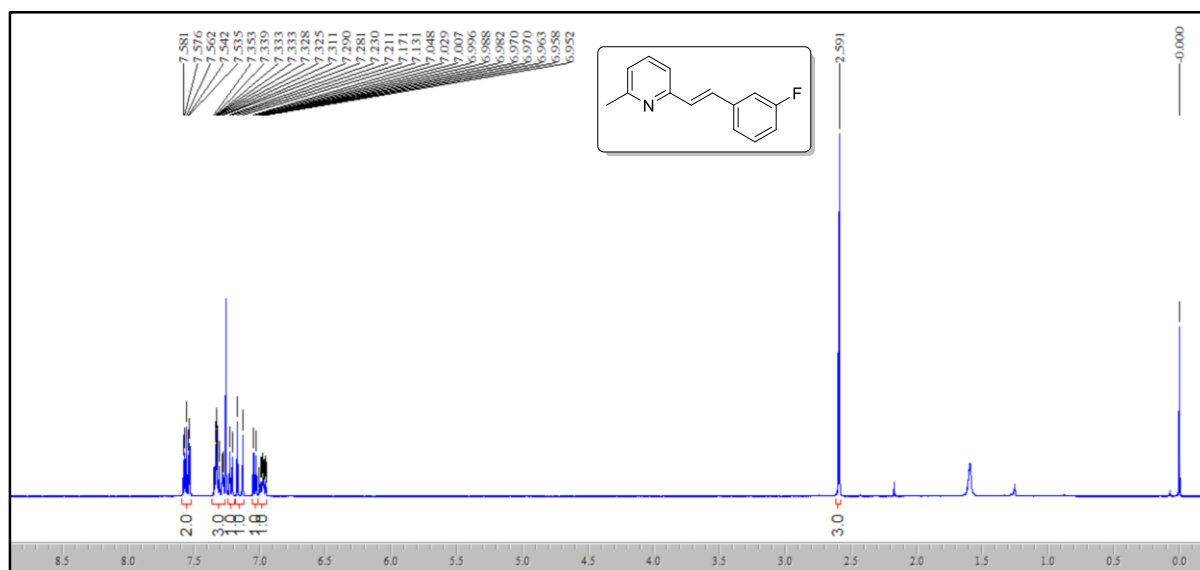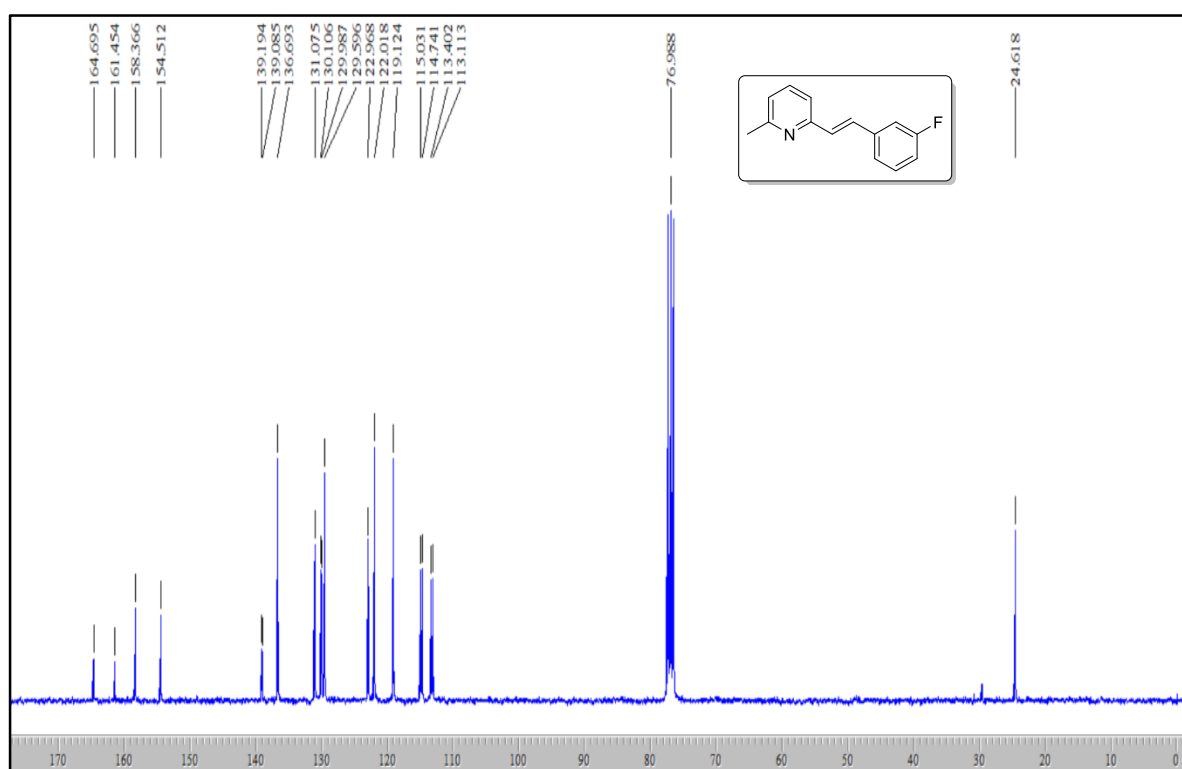

**1-(4-Fluorophenyl)-2-(6-methylpyridin-2-yl)ethan-1-ol (3f)**

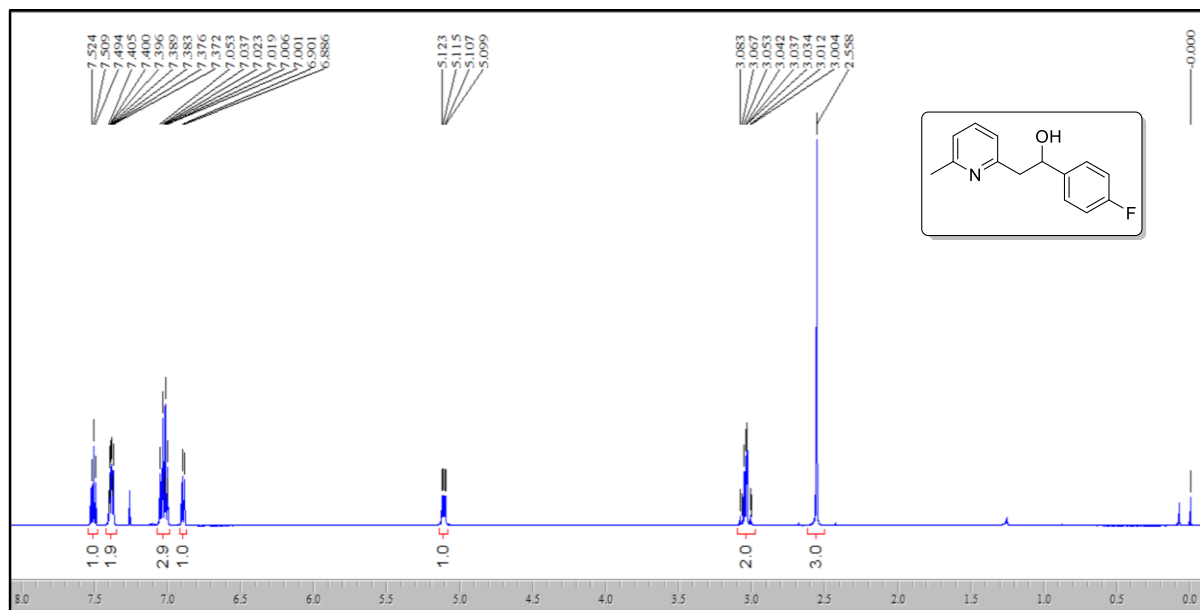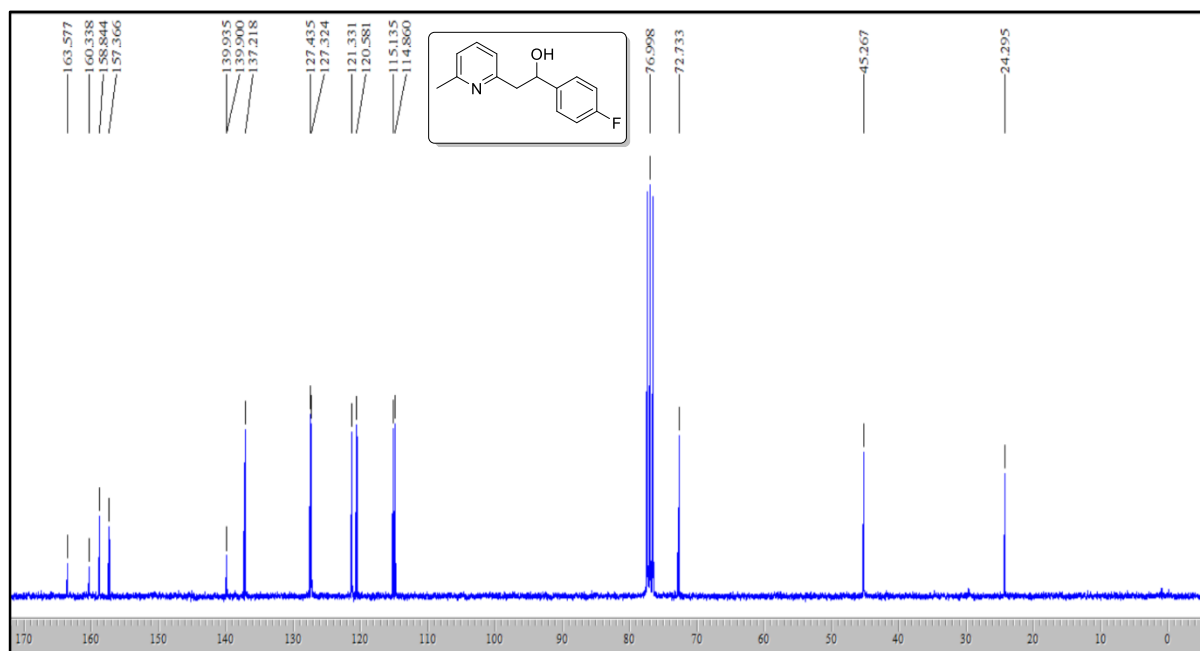

**1-(4-Chlorophenyl)-2-(6-methylpyridin-2-yl)ethan-1-ol (3g)**

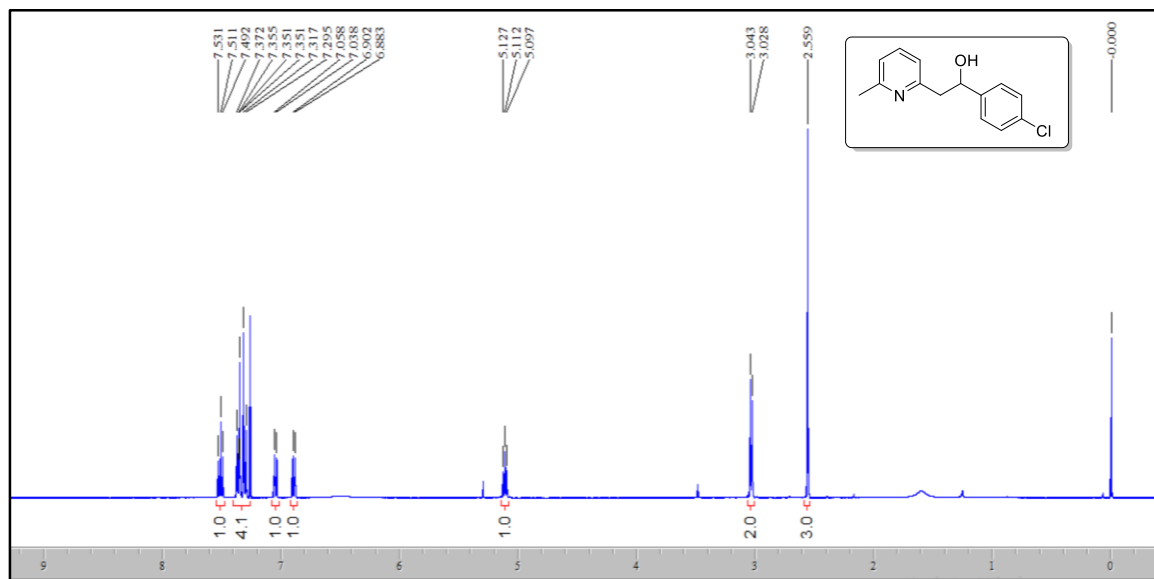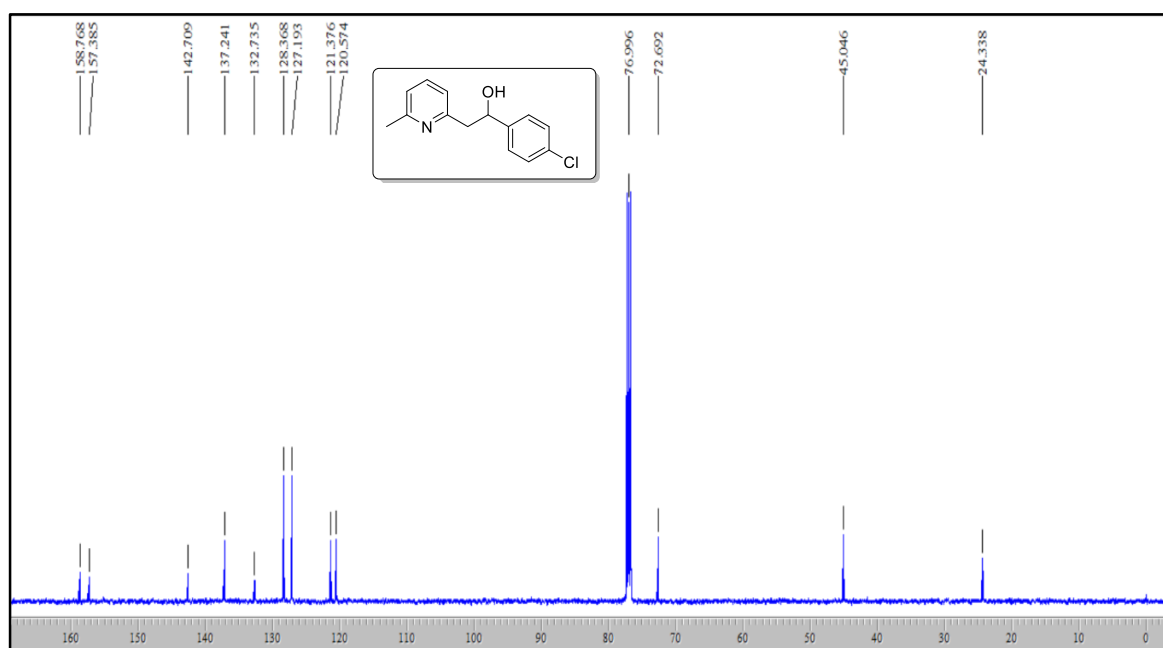

**1-(4-Bromophenyl)-2-(6-methylpyridin-2-yl)ethan-1-ol (3h)**

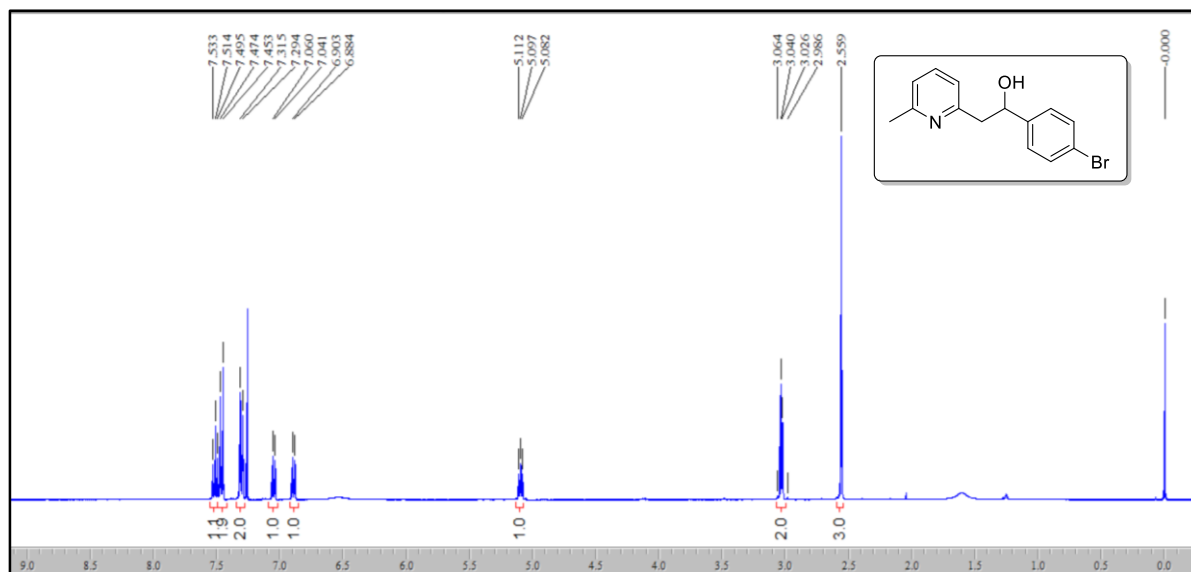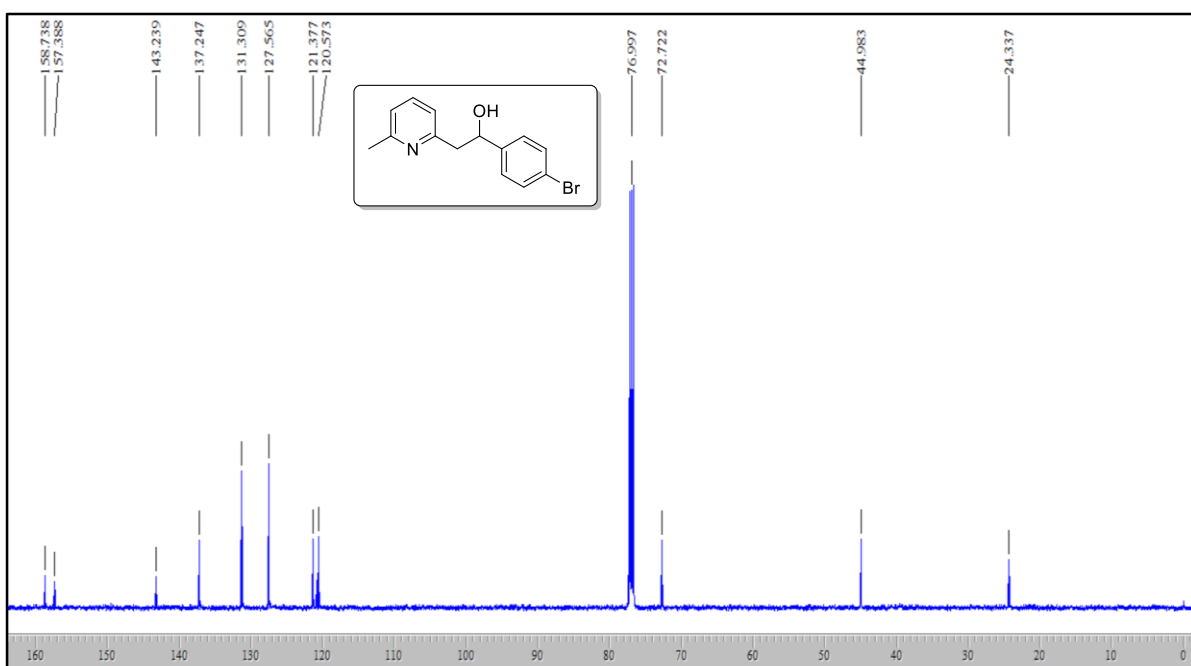

**(E)-4-(2-(6-Methylpyridin-2-yl)vinyl)benzonitrile (4i)**

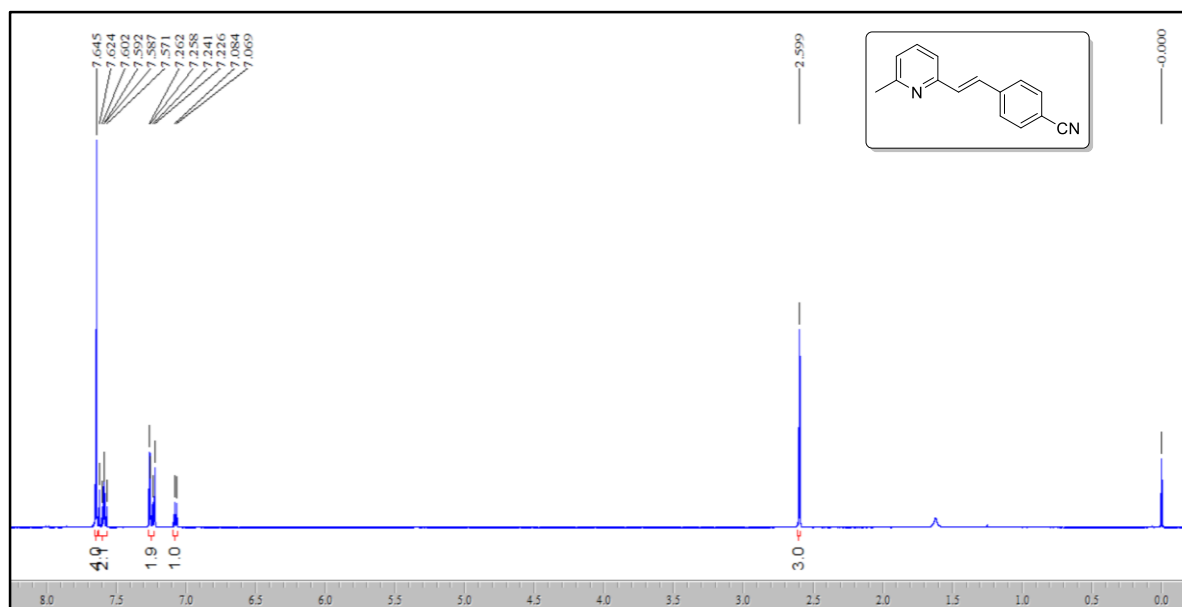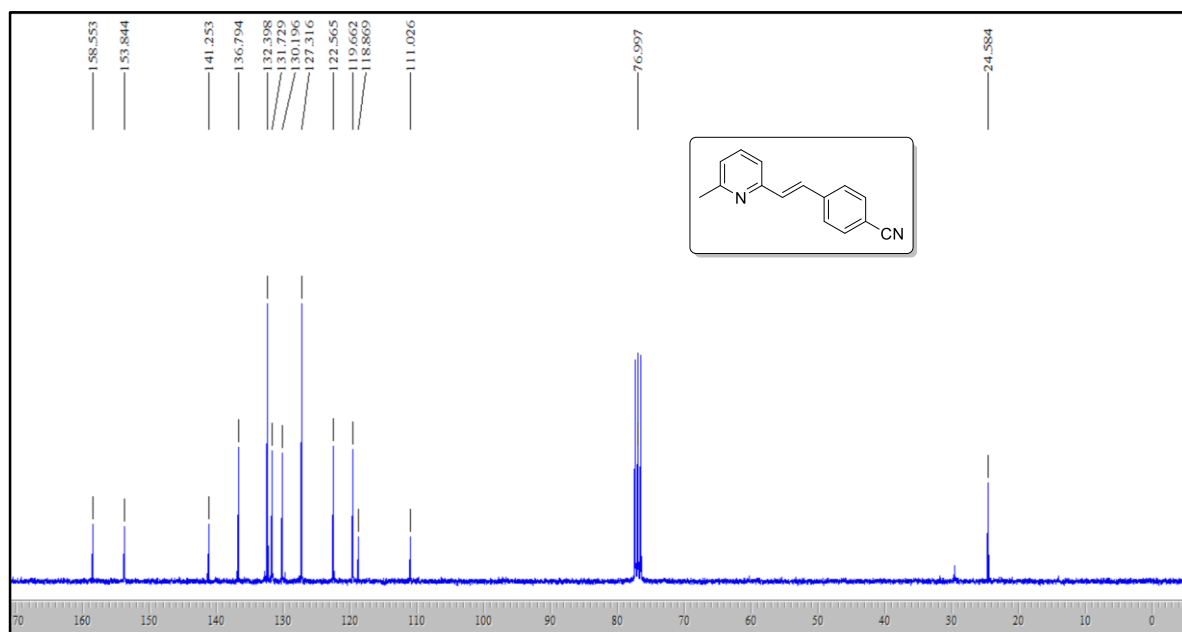

**(E)-2-Methyl-6-(2-(trifluoromethyl)styryl)pyridine (4j)**

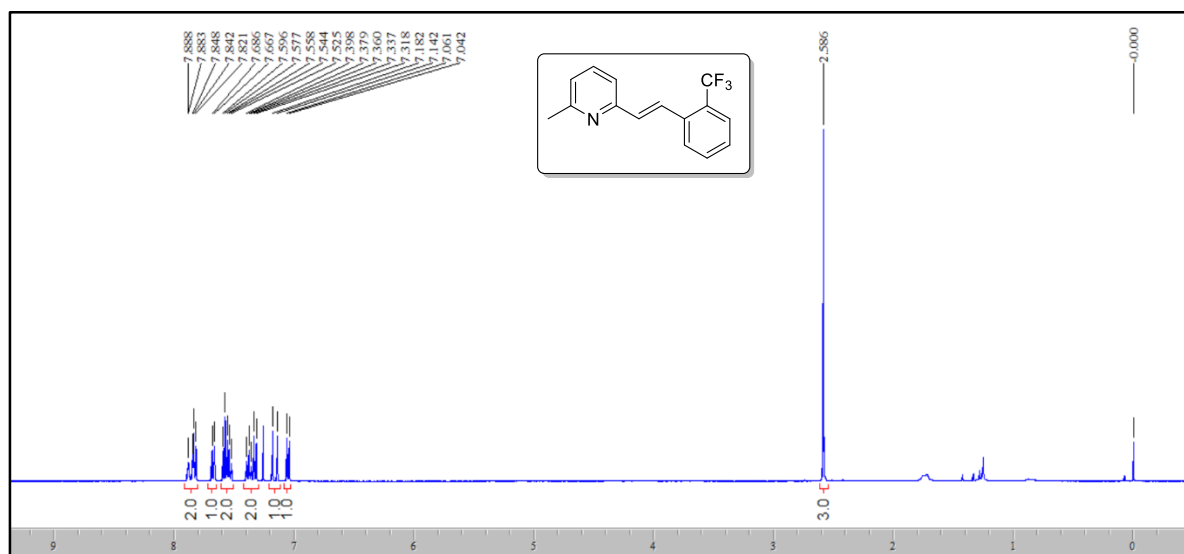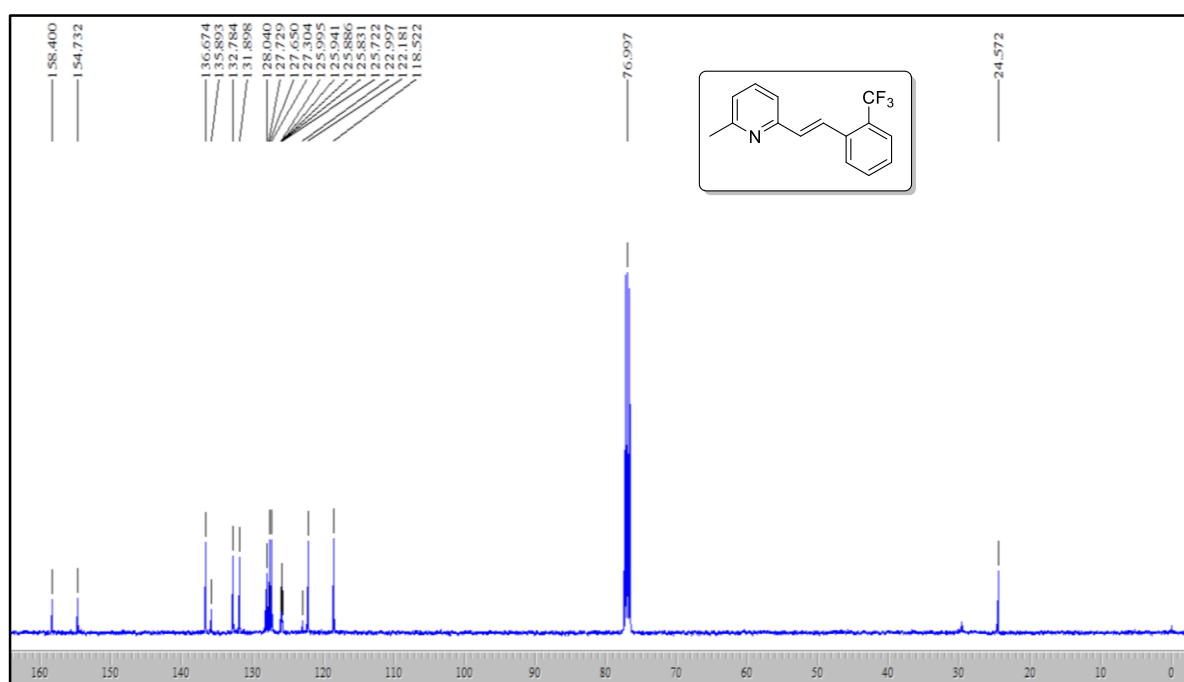

**(E)-4-(2-(6-Methylpyridin-2-yl)vinyl)benzaldehyde (4k)**

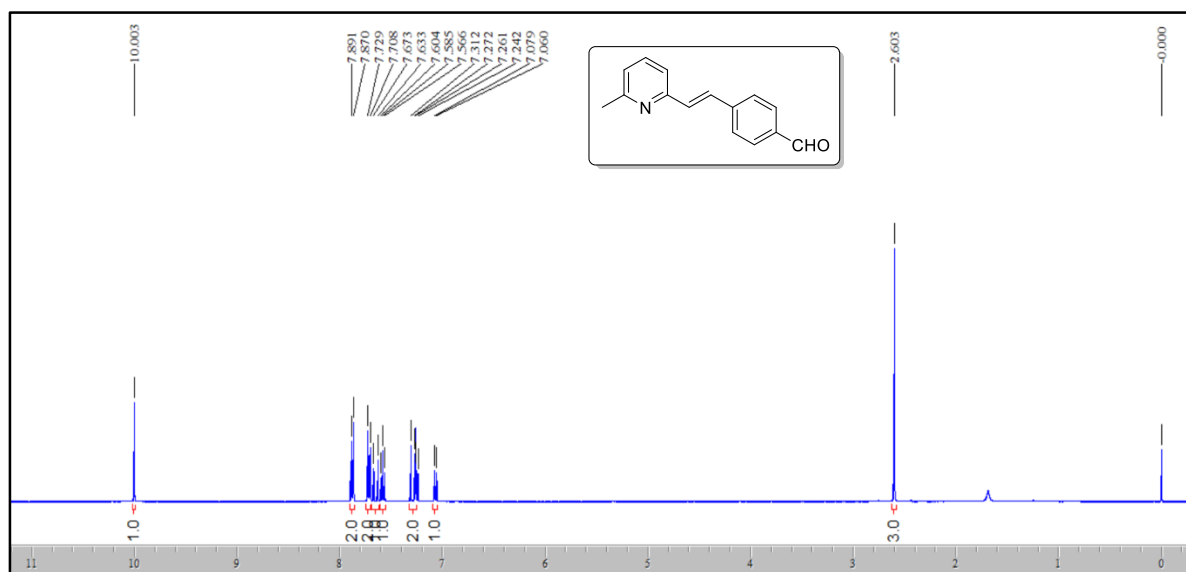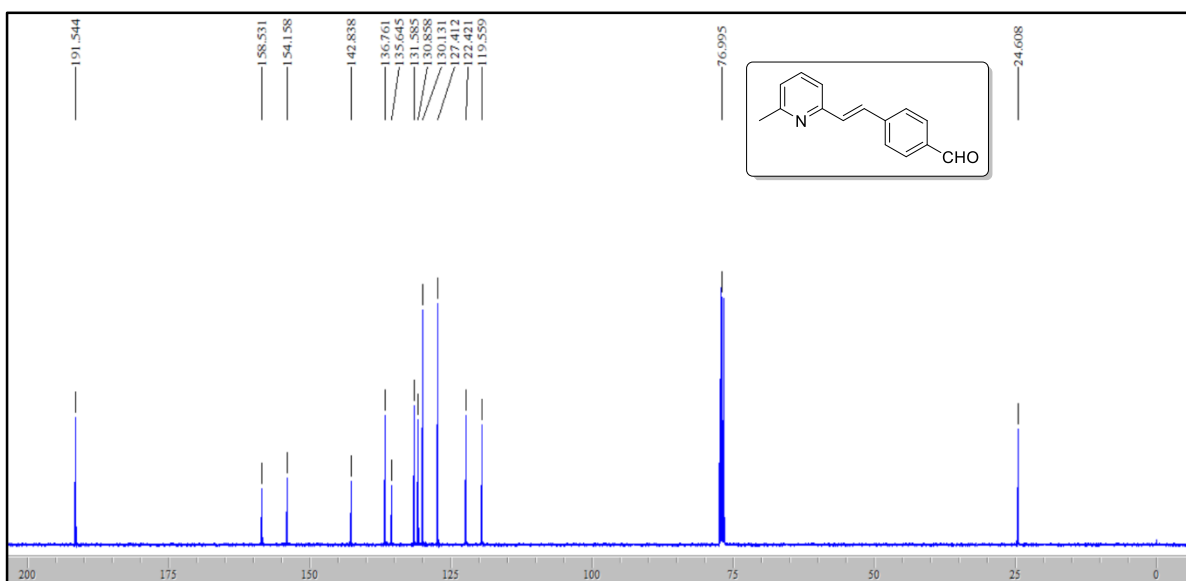



***N*-(4-(1-Hydroxy-2-(6-methylpyridin-2-yl)ethyl)phenyl)acetamide (3l)**

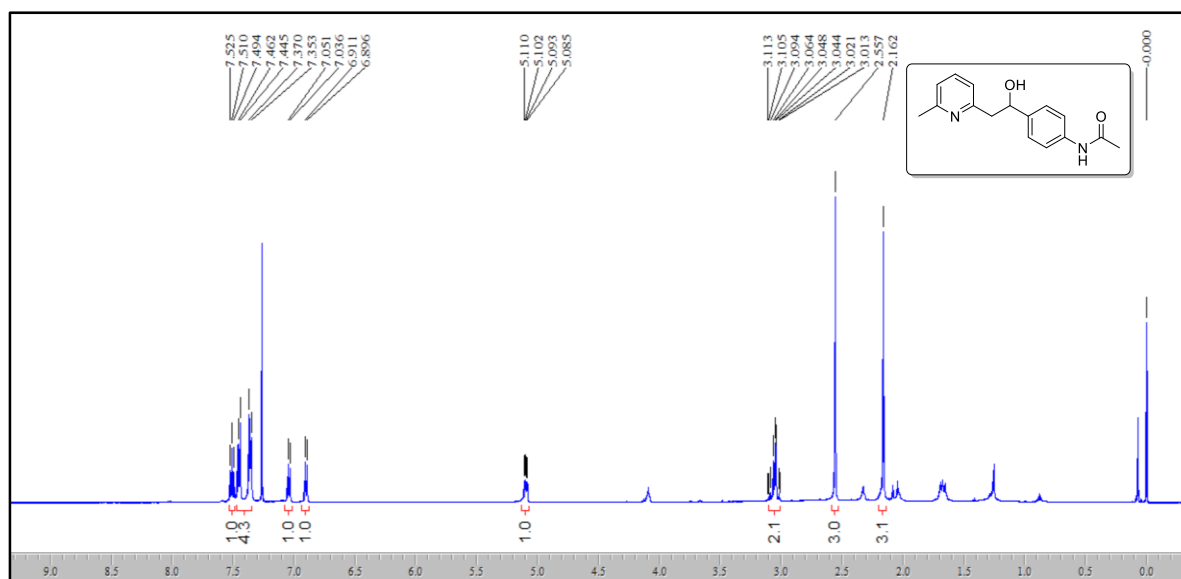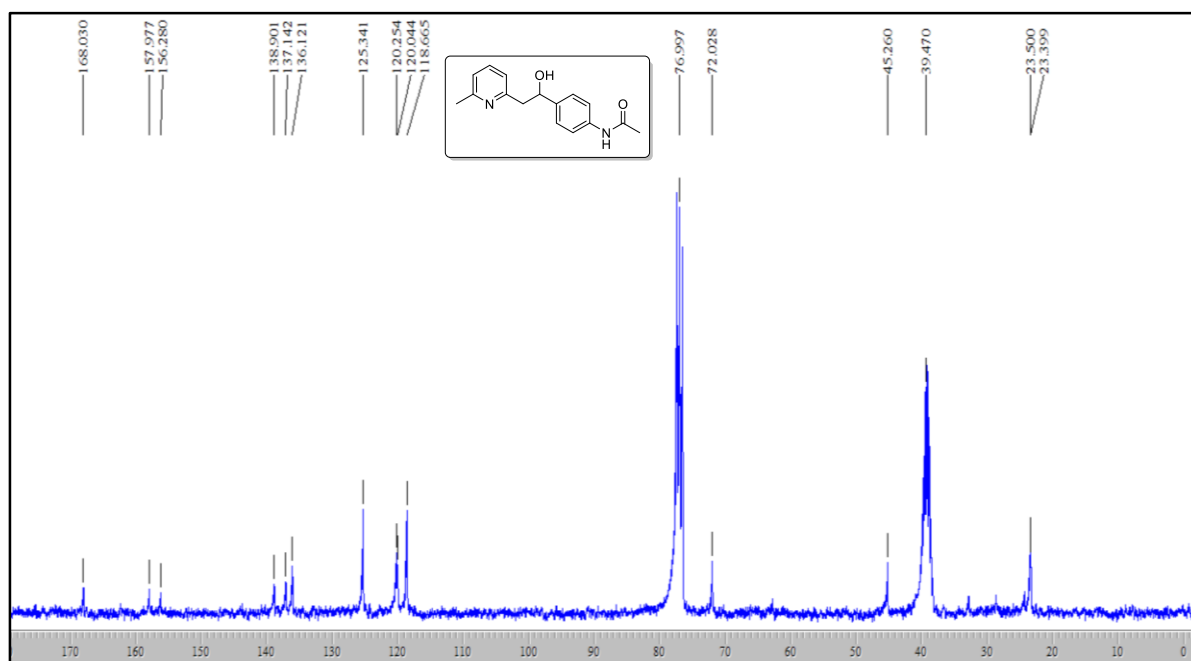

**(E)-4-(2-(6-Methylpyridin-2-yl)vinyl)phenol (4m)**

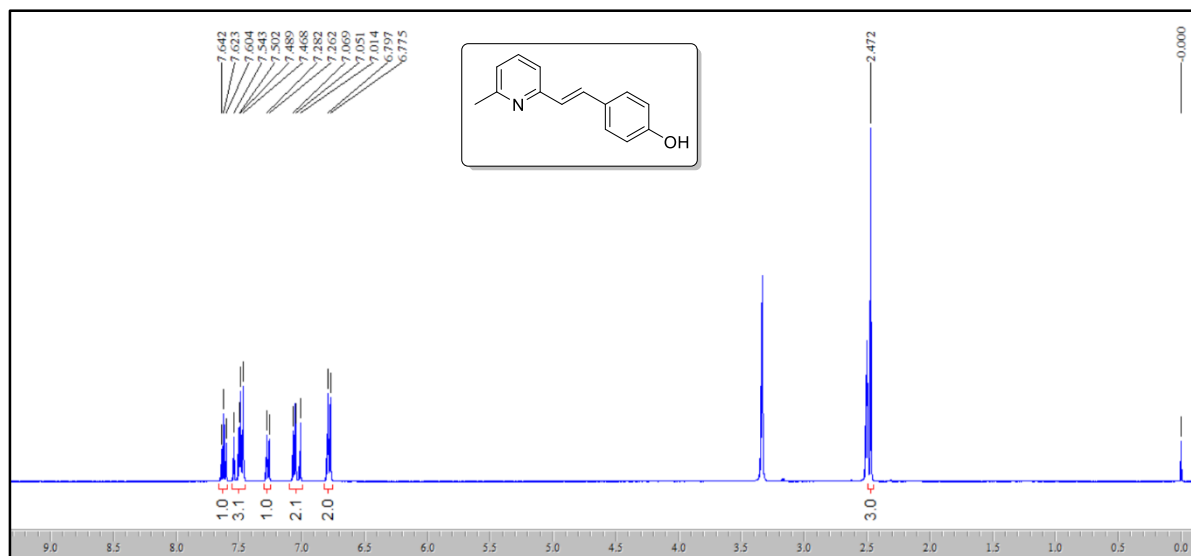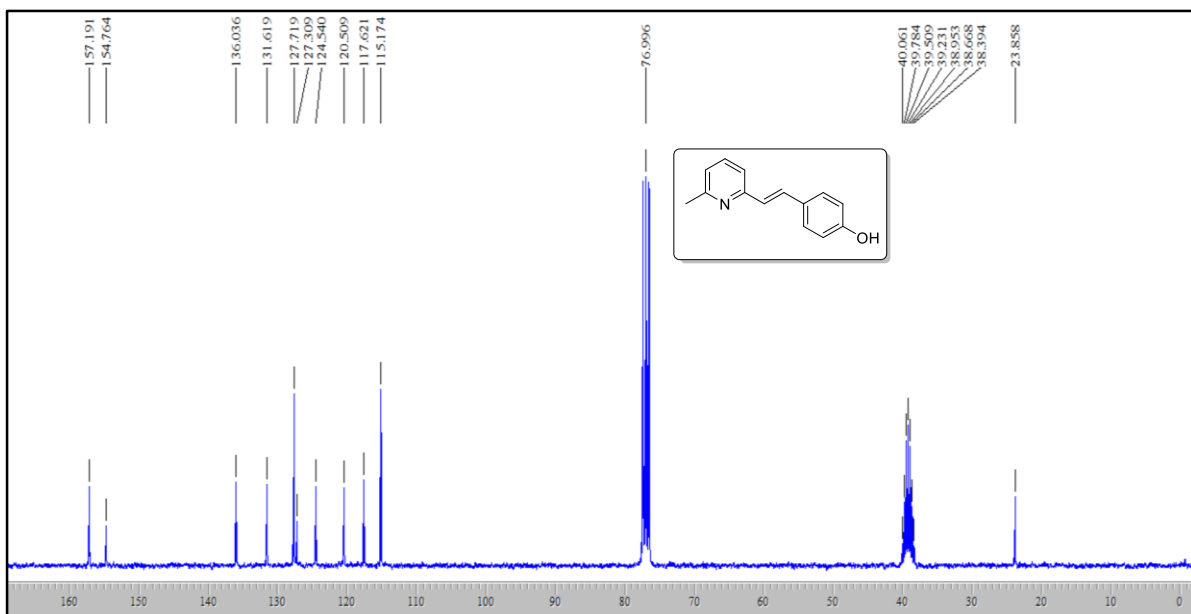

**(E)-2-(2-(6-Methylpyridin-2-yl)vinyl)phenol (4n)**

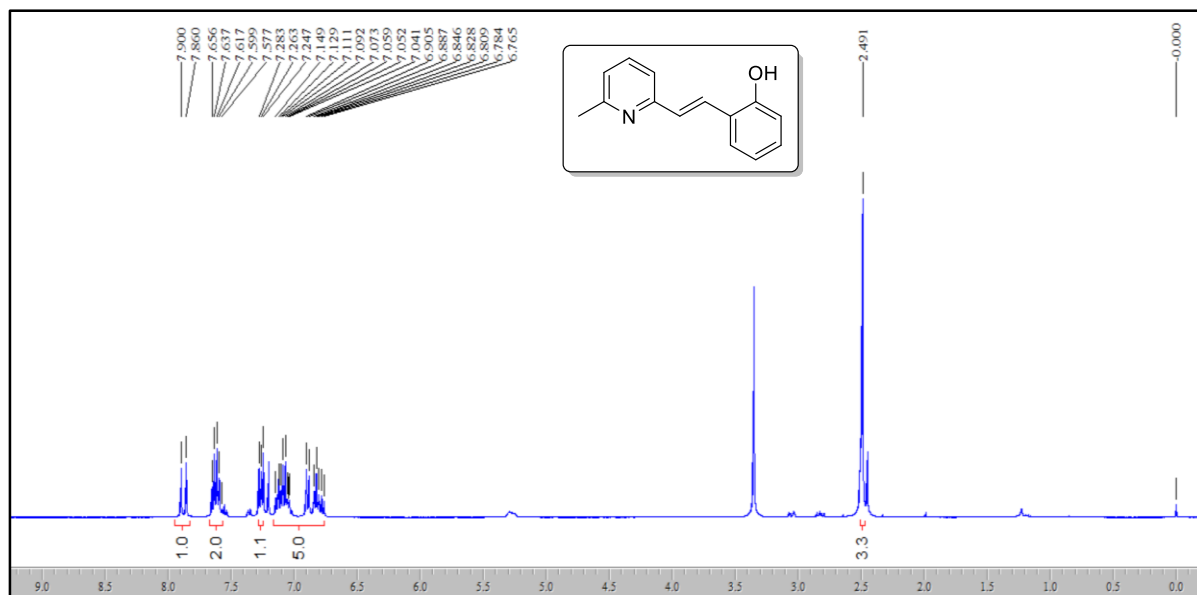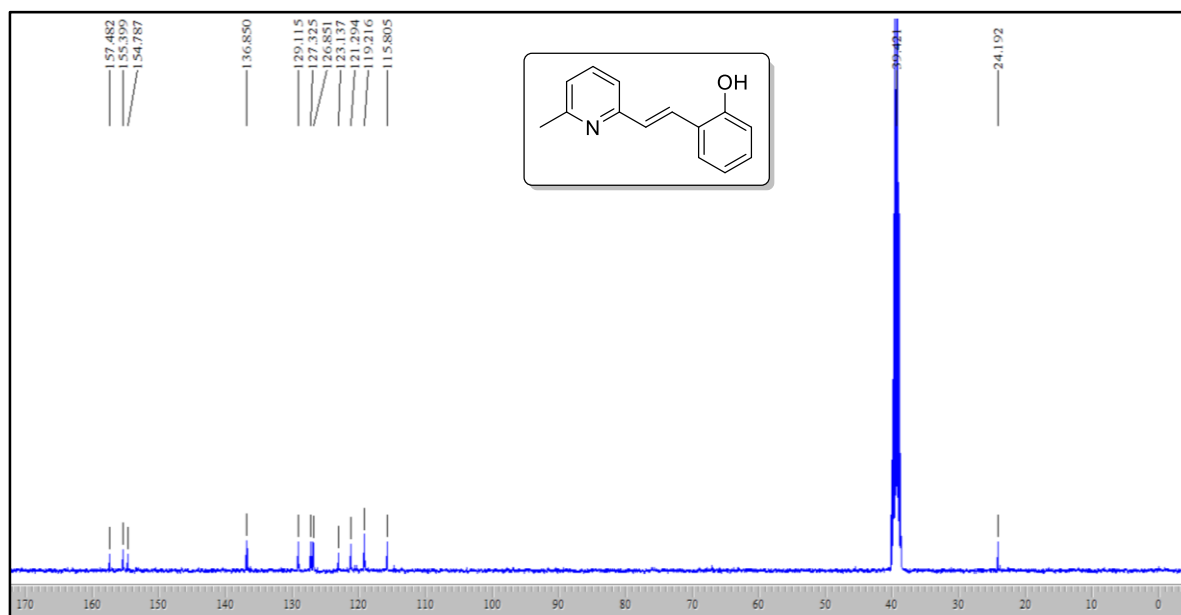

**(E)-2-Methyl-6-(4-methylstyryl)pyridine (4o)**

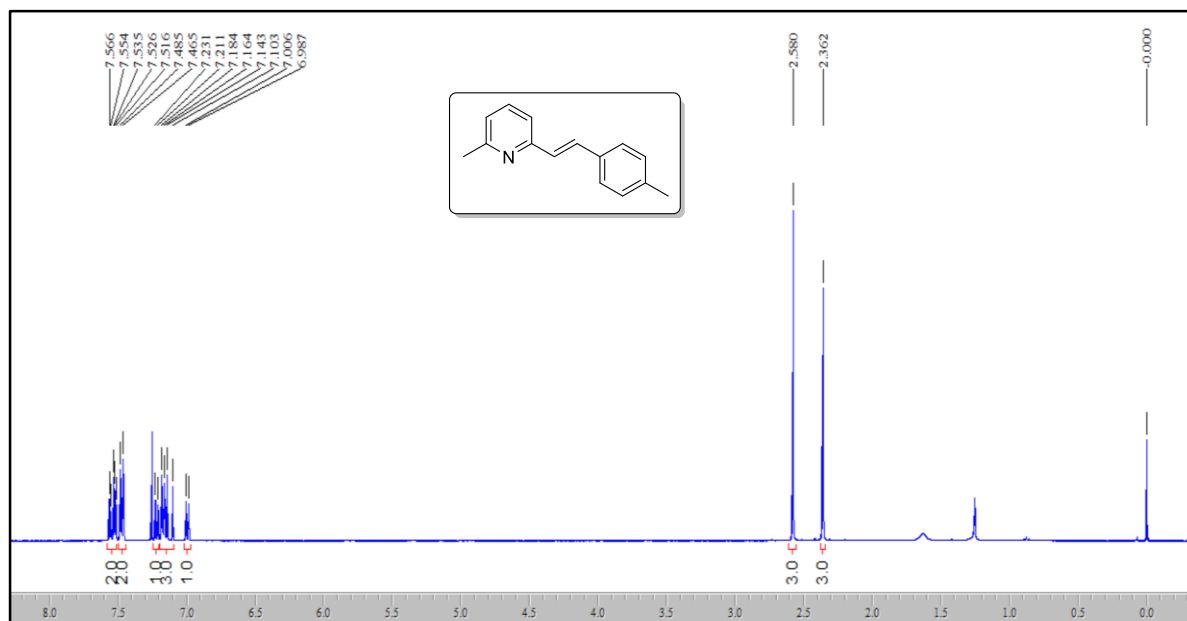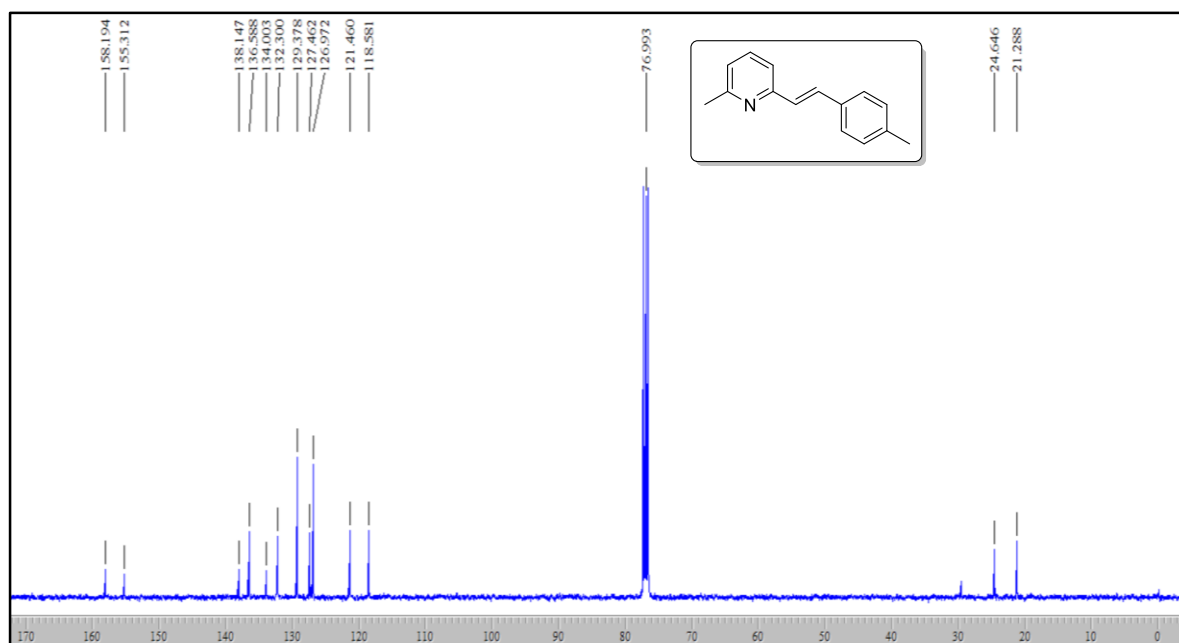

## 2-(6-Methylpyridin-2-yl)-1-phenylethan-1-ol (3p)

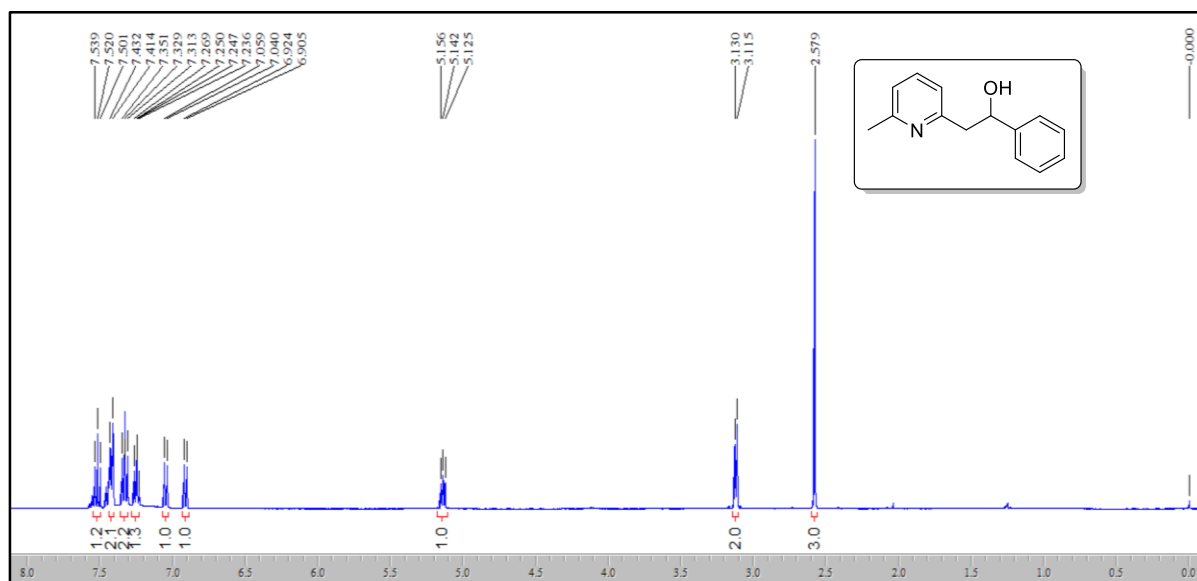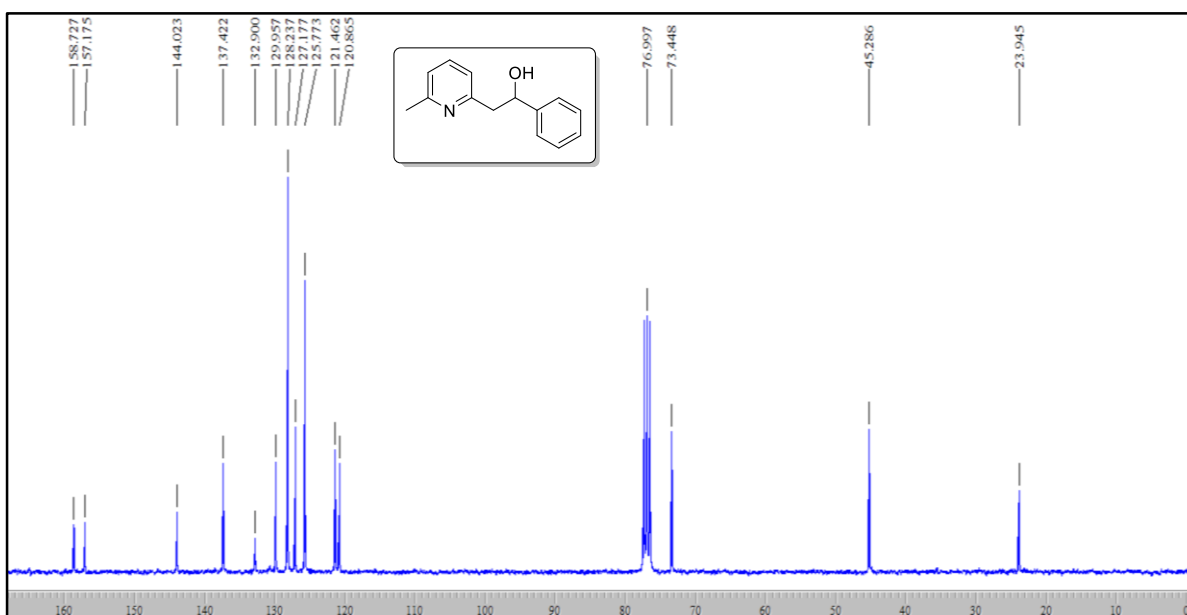

**(E)-2-Methyl-6-(2-(pyridin-2-yl)vinyl)pyridine (4q)**

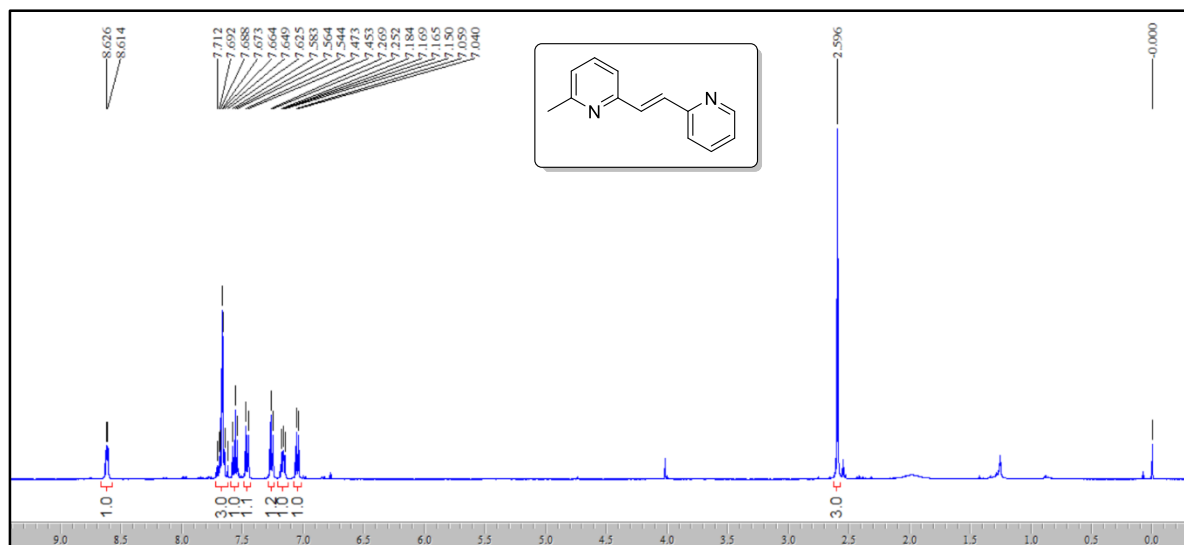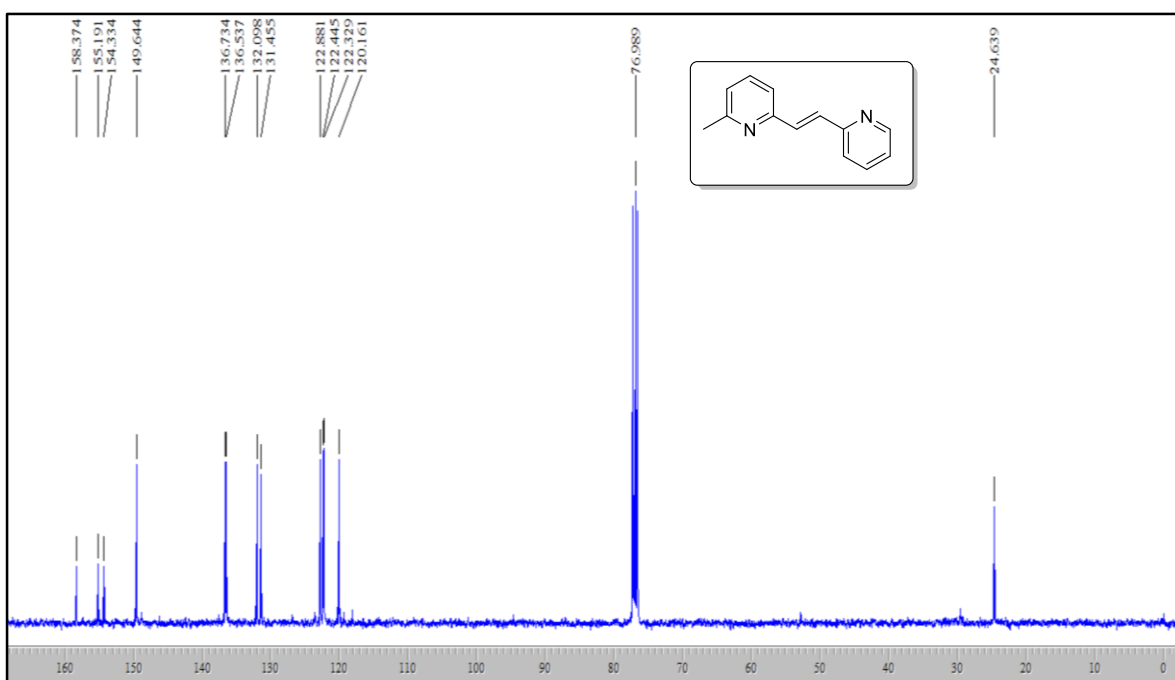

**2-(6-Methylpyridin-2-yl)-1-(thiophen-2-yl)ethan-1-ol (3r)**

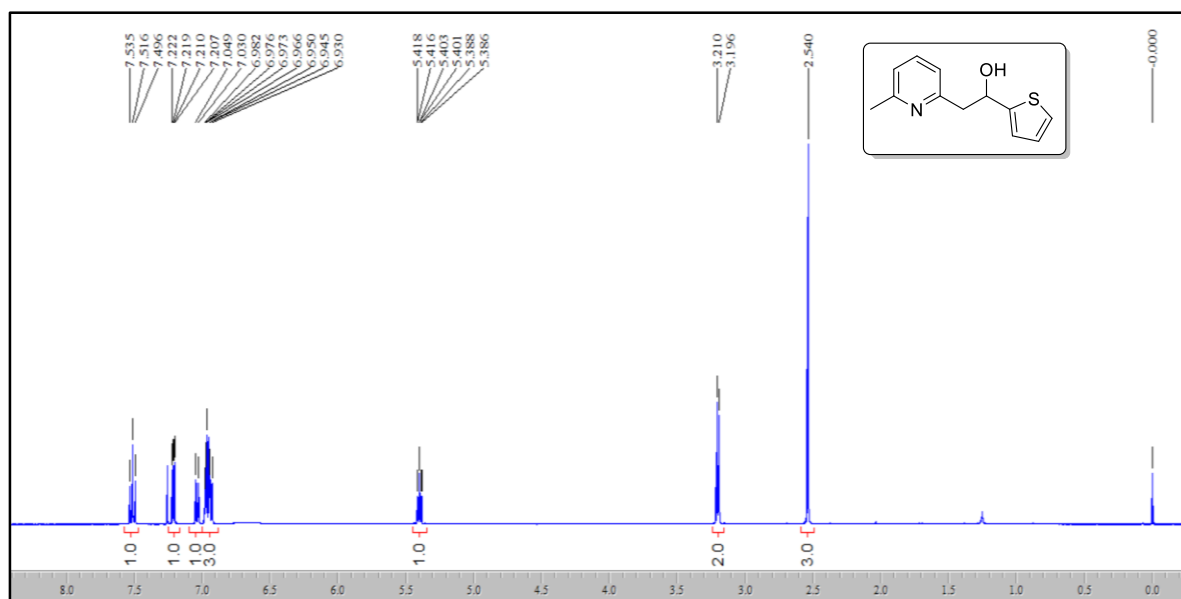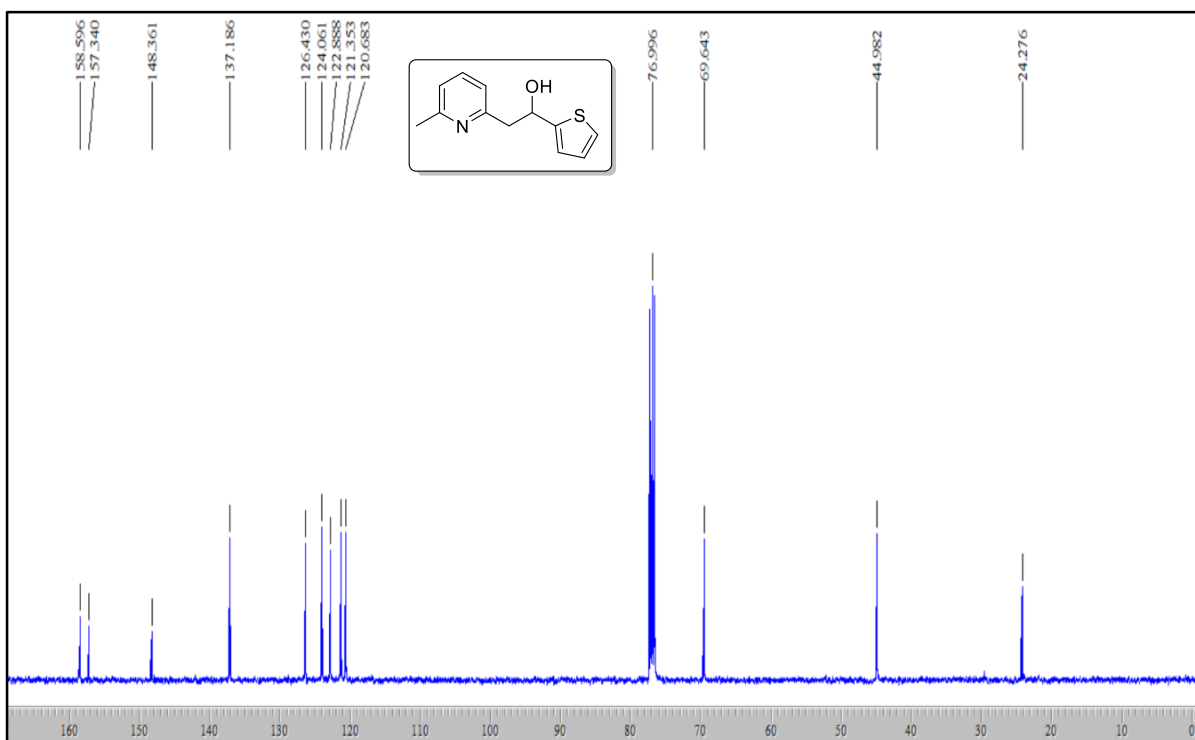

**2-(4,6-Dimethylpyridin-2-yl)-1-(4-nitrophenyl)ethan-1-ol (5b)**

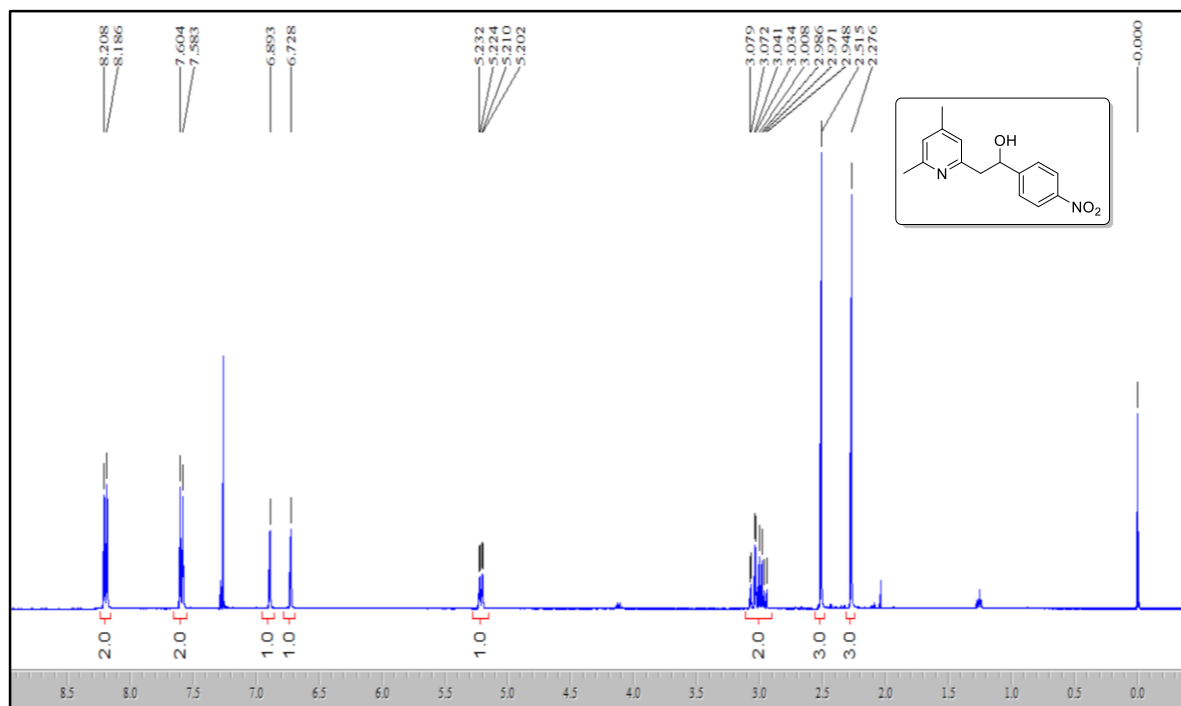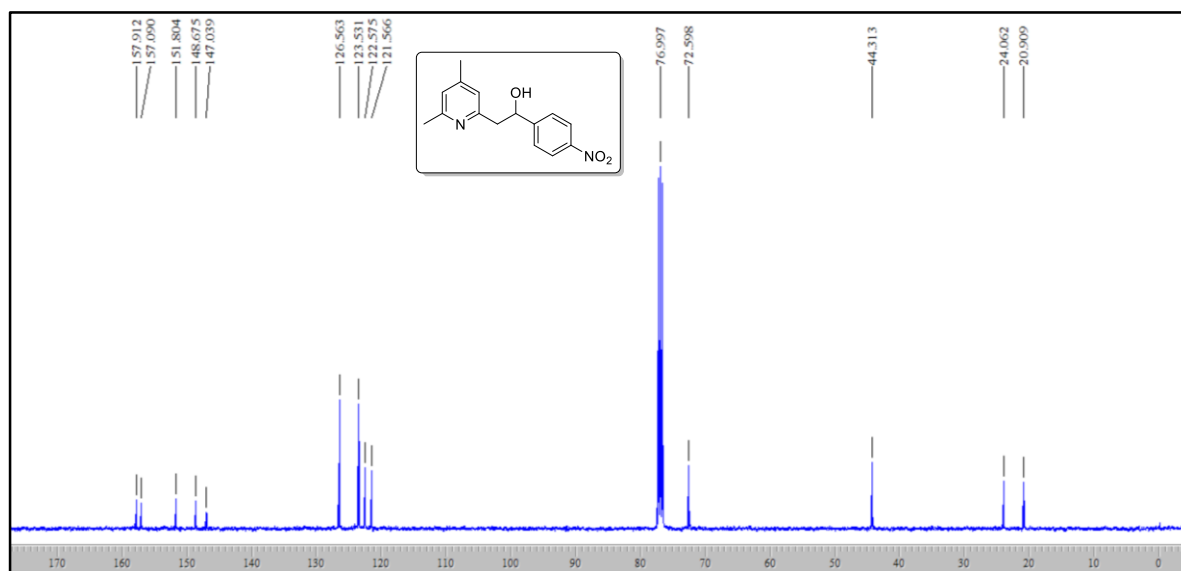



**1-(4-Nitrophenyl)-2-(pyridin-2-yl)propan-1-ol (5c)**

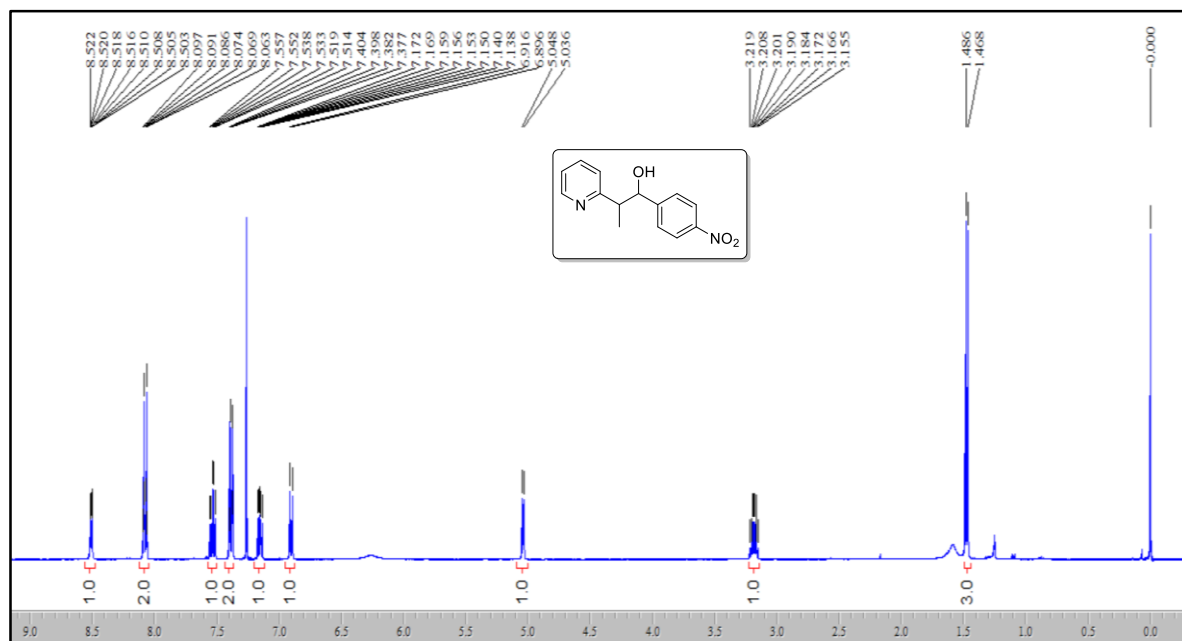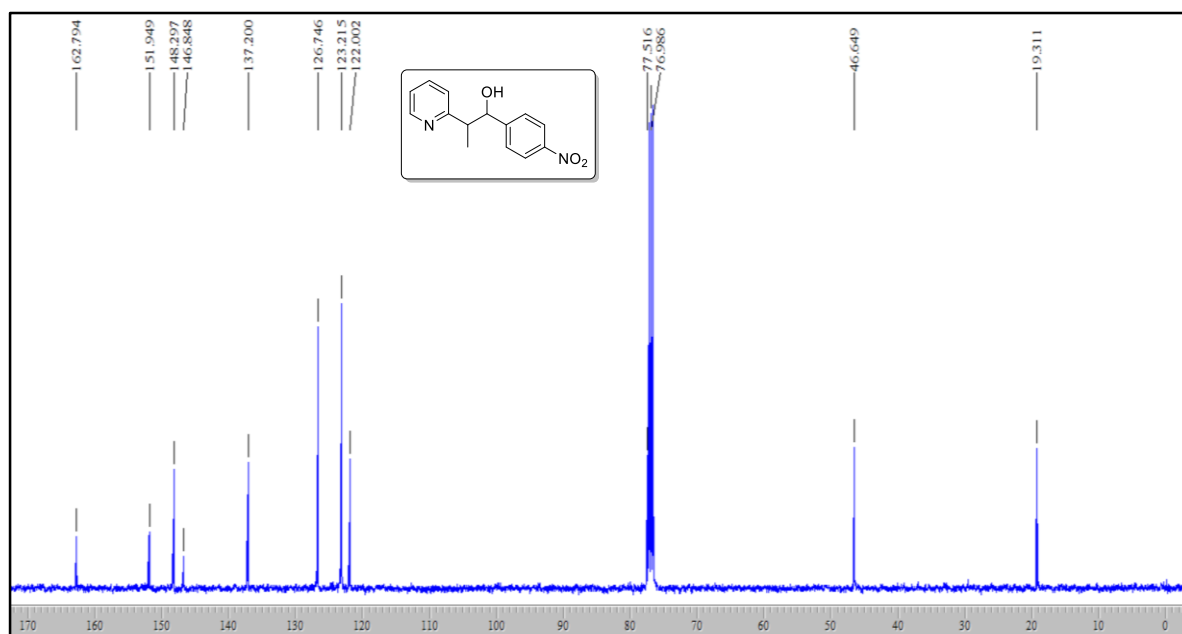

**1-(4-Nitrophenyl)-2-(pyridin-2-yl)ethan-1-ol (5d)**

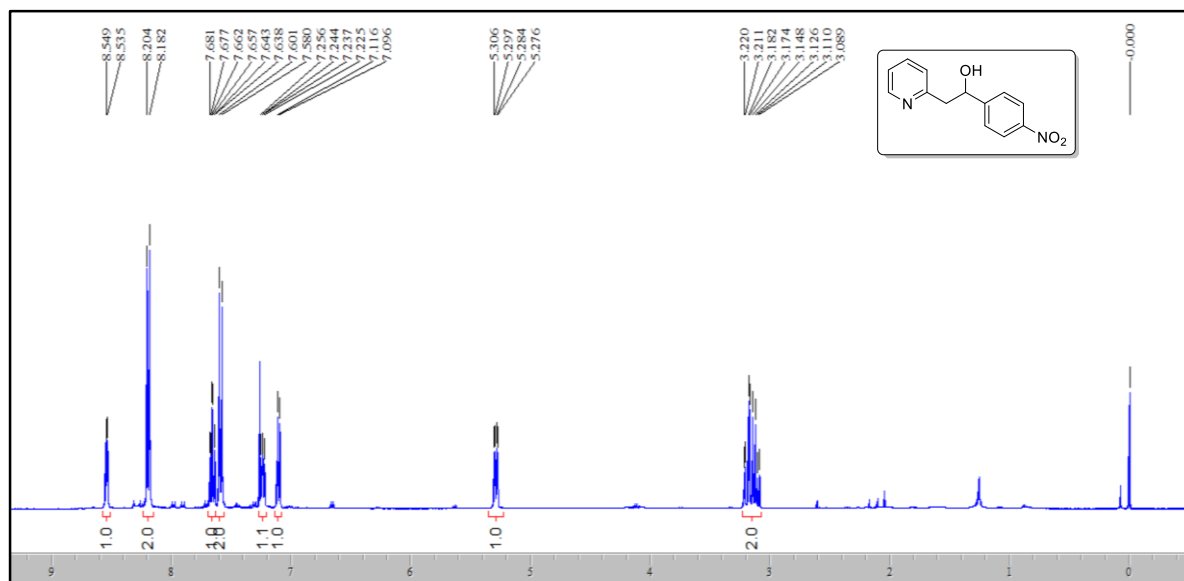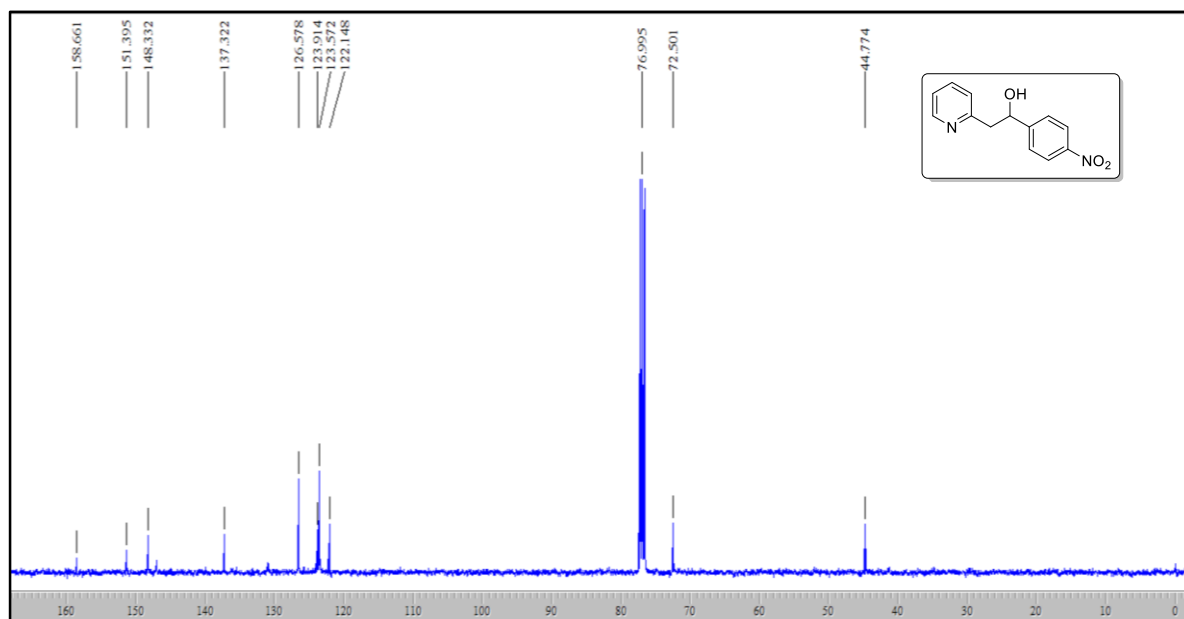

**(E)-2-(4-Nitrostyryl)pyridine (6d)**

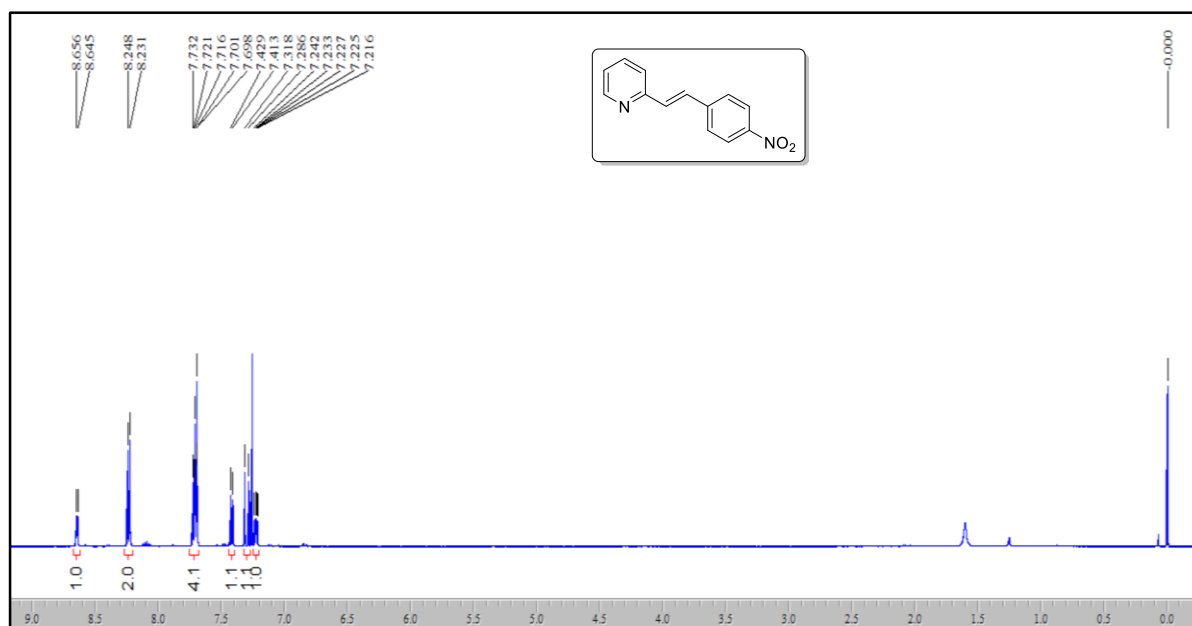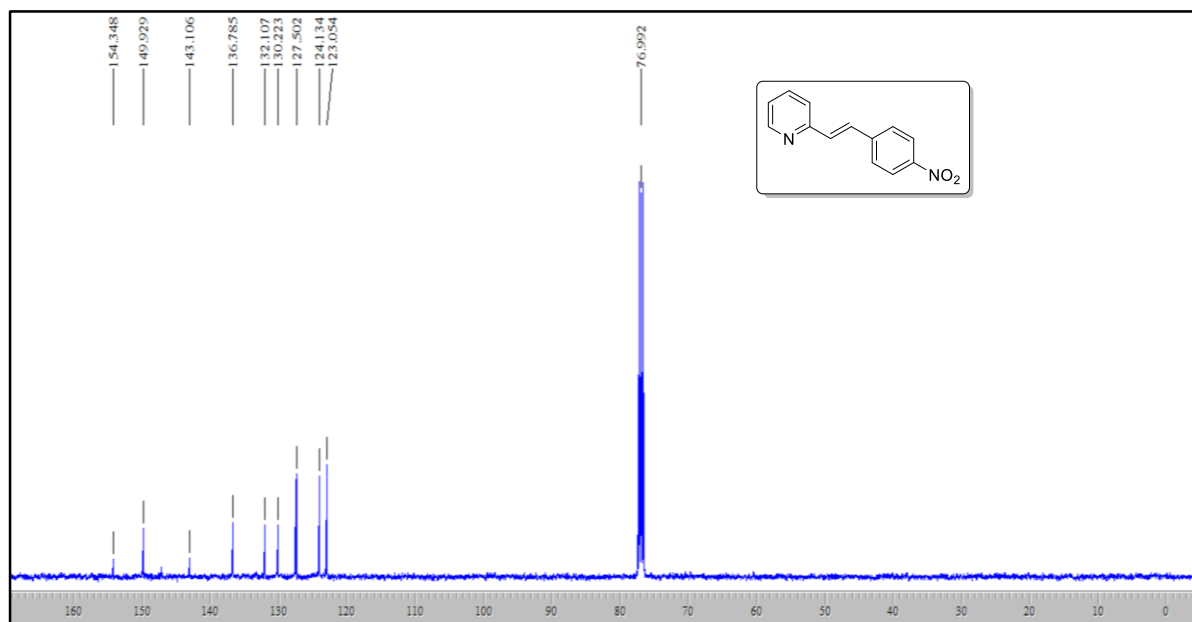

**(*E*)-2-(4-Nitrostyryl)quinoline (6f)**

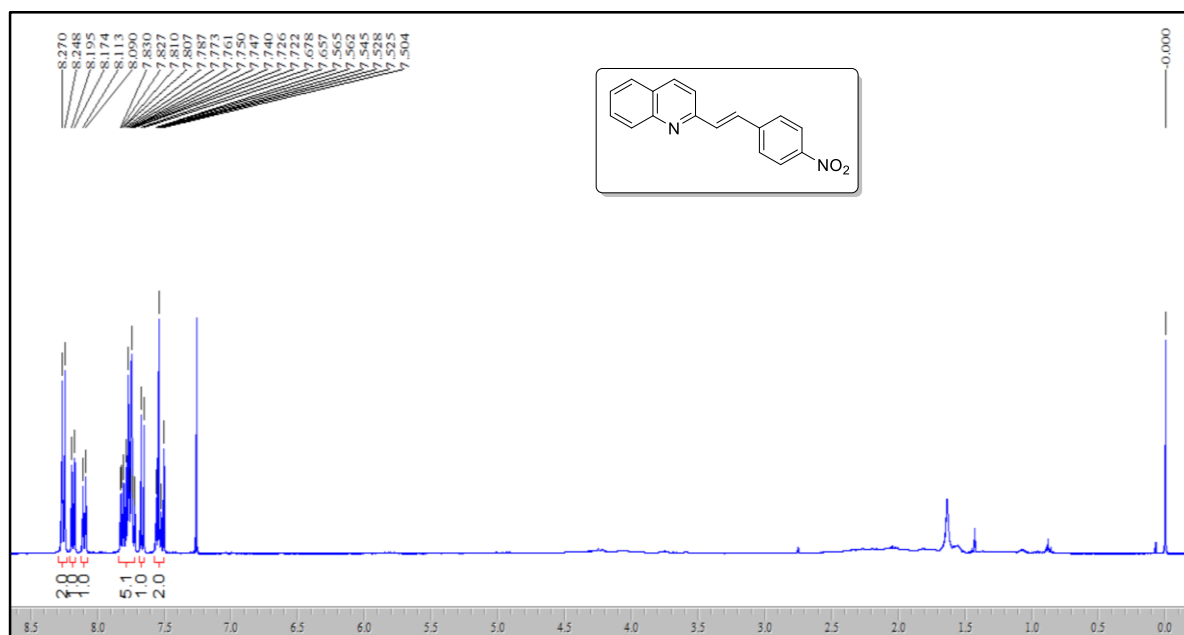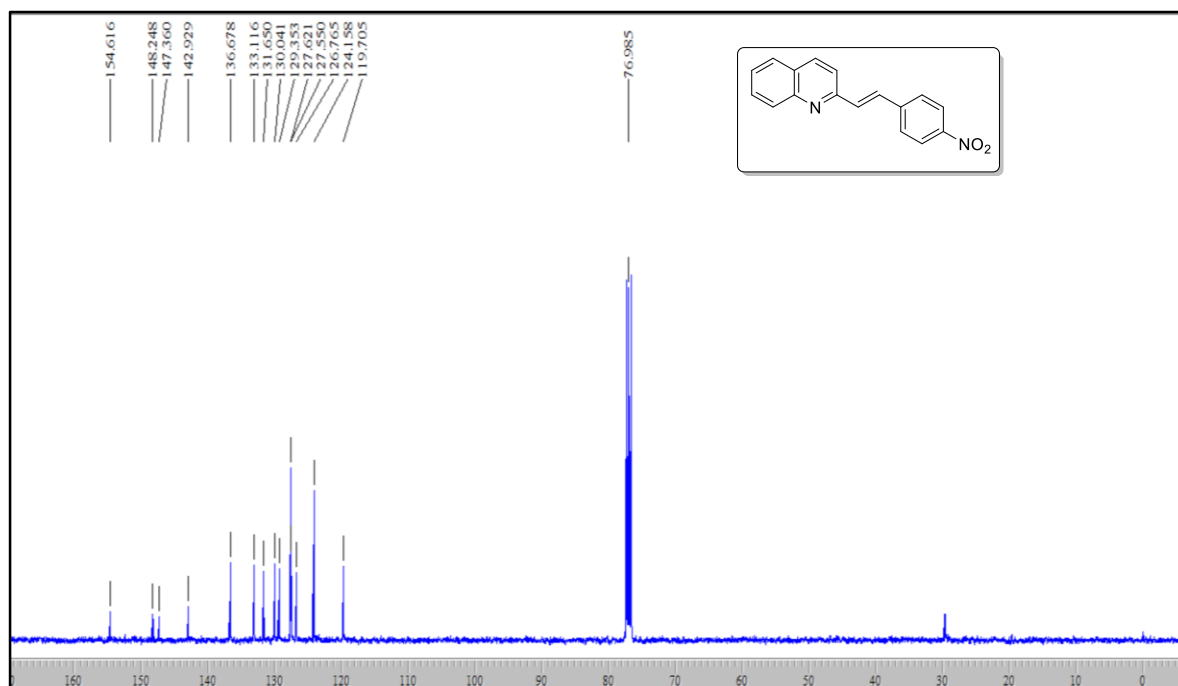

**(E)-6-Fluoro-2-(4-nitrostyryl)quinoline (6g)**

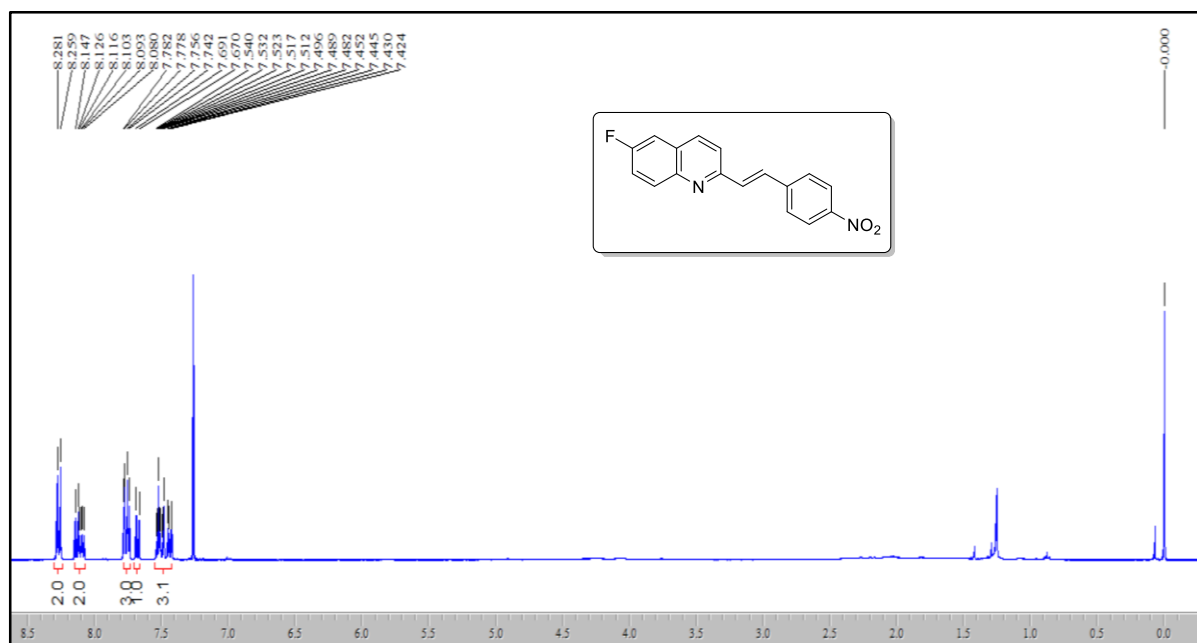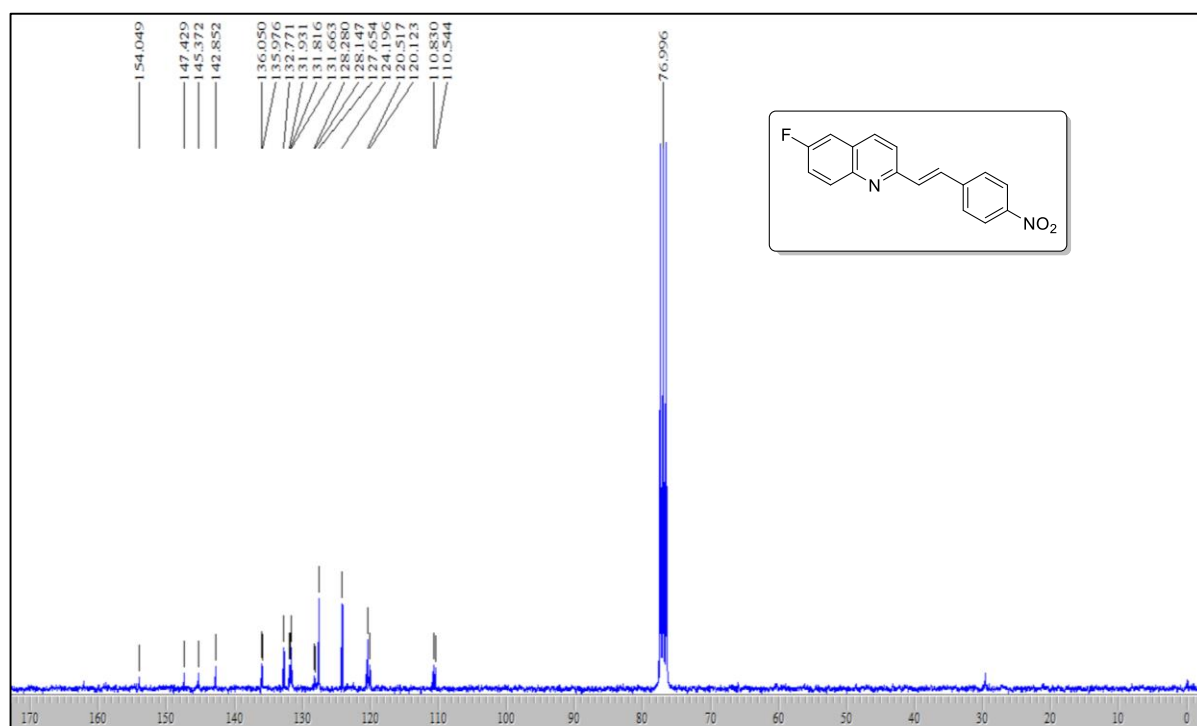

#### 4. References

1. Ortalm, A.; Rathousky, J.; Ekloff, G. S.; Zukal, A. *Microporous Mater.*, **1996**, *6*, 171-180.
2. Dan, M.; Gang, H.; Shengying, W.; Xin, L.; Jianjun, Y.; Limin, W. *Eur. J. Org. Chem.*, **2014**, *2014*, 3009–3019.
3. Wang, F. F.; Luo, C. P.; Wang, Y.; Deng, G.; Yang, L. *Org. Biomol. Chem.*, **2012**, *10*, 8605–8608.
